# Supplementary material for: Bifunctional thiourea-modified polymers of intrinsic microporosity for enantioselective α-amination of 3-aryl-2-oxindoles in batch and flow conditions
Source: Royal Society of Chemistry journal article supplement (doi:10.1039/d0ob01373k), 2020-01-01
Supplement: d0ob01373k1.pdf [file d0ob01373k1.pdf]

## SUPPORTING INFORMATION

### **Bifunctional Thiourea-modified Polymers of Intrinsic Microporosity for Enantioselective Amination of 3-Aryl-2-oxindoles in Batch and Flow Conditions.**

Laura Martín,<sup>a</sup> Alicia Maestro,<sup>a</sup> José M. Andrés,<sup>a</sup> \* and Rafael Pedrosa<sup>a</sup> \*

<sup>a</sup> Instituto CINQUIMA and Departamento de Química Orgánica, Facultad de Ciencias,  
Universidad de Valladolid, Paseo de Belén 7, 47011-Valladolid. Spain

E-mail: [jmandres@qo.uva.es](mailto:jmandres@qo.uva.es); [pedrosa@qo.uva.es](mailto:pedrosa@qo.uva.es)

## **Table of contents**

|                                                                         |            |
|-------------------------------------------------------------------------|------------|
| <b>1.- NMR spectra (PIM-1n, Catalyst II, 6a-g, 7, 8, 9, 10, 11, 12)</b> | <b>S3</b>  |
| <b>2.- NMR spectra of crude mixtures in toluene and dichloromethane</b> | <b>S15</b> |
| <b>3.- IR spectra (PIM-1n, Amine PIM-1n, Catalyst II)</b>               | <b>S17</b> |
| <b>4.- TGA analysis (PIM-1n, Amine PIM-1n, Catalyst II)</b>             | <b>S18</b> |
| <b>5.- BET analysis and SEM micrographs (Catalyst II)</b>               | <b>S19</b> |
| <b>6.- HPLC chromatograms</b>                                           | <b>S20</b> |

# 1. NMR (PIM-1n, Catalyst II, 6a-g, 7, 8, 9, 10, 11, 12)

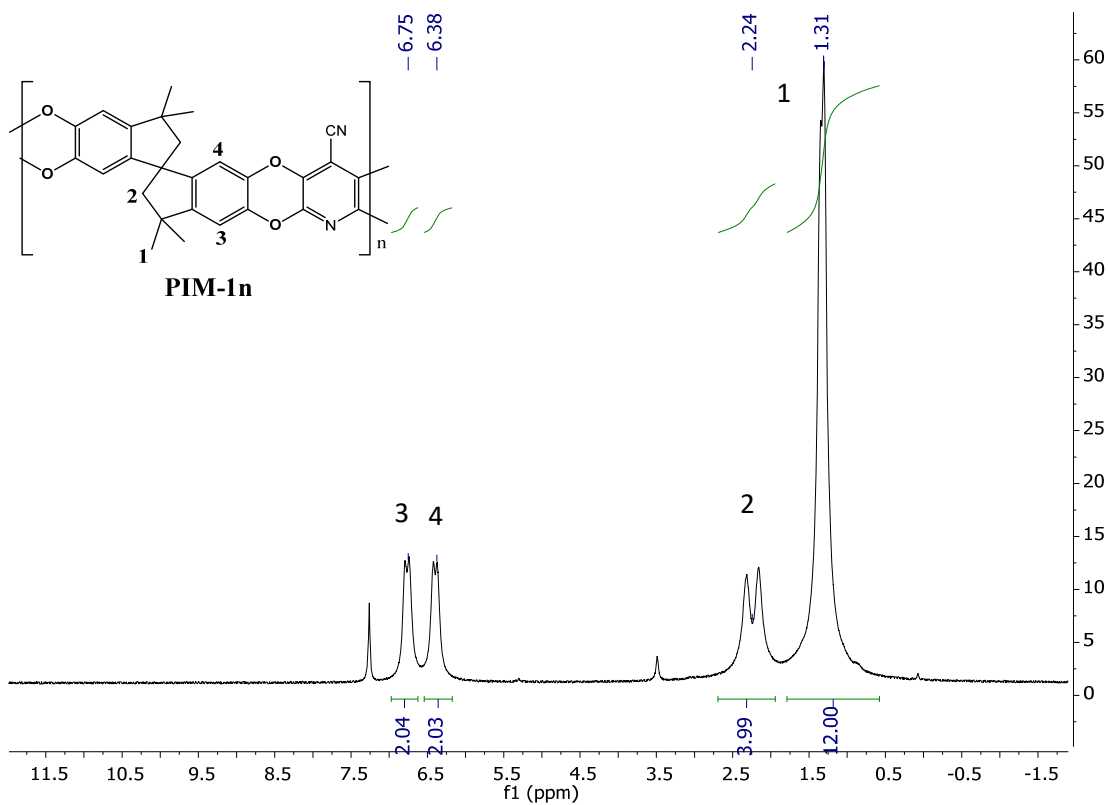

Figure S1. <sup>1</sup>H NMR spectrum of PIM-1n (CDCl<sub>3</sub>, 400 MHz)

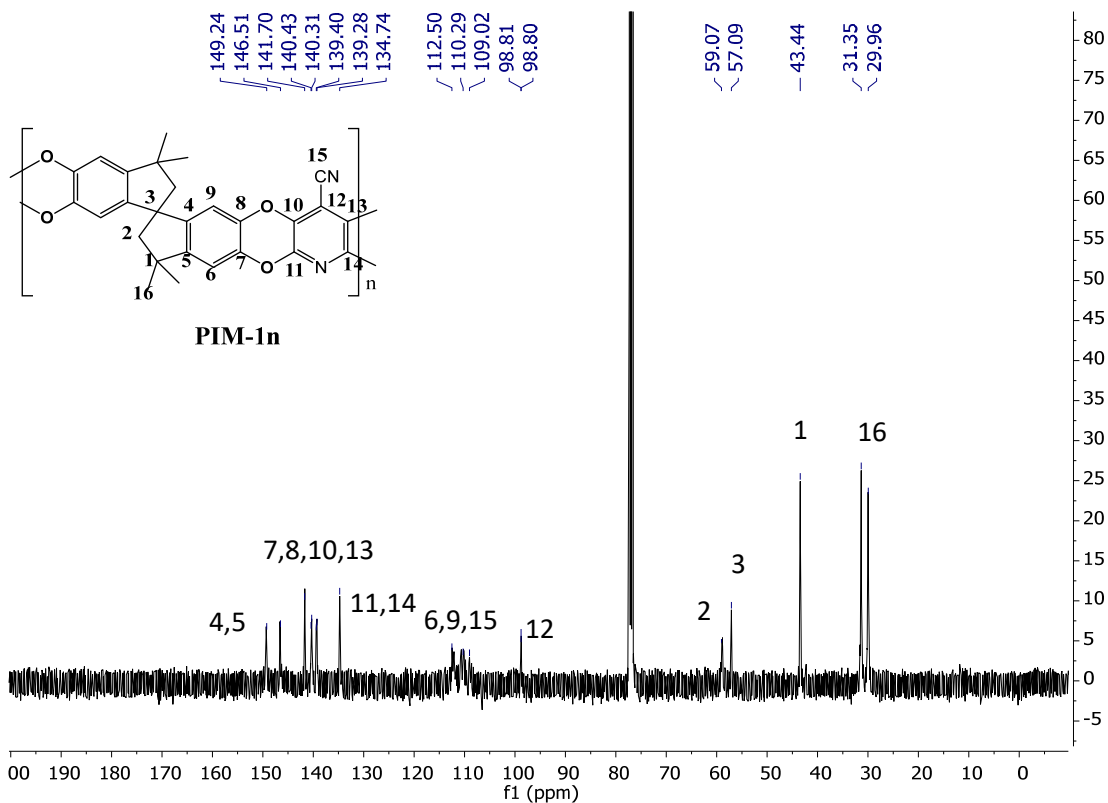

Figure S2. <sup>13</sup>C NMR spectrum of PIM-1n (CDCl<sub>3</sub>, 100 MHz)

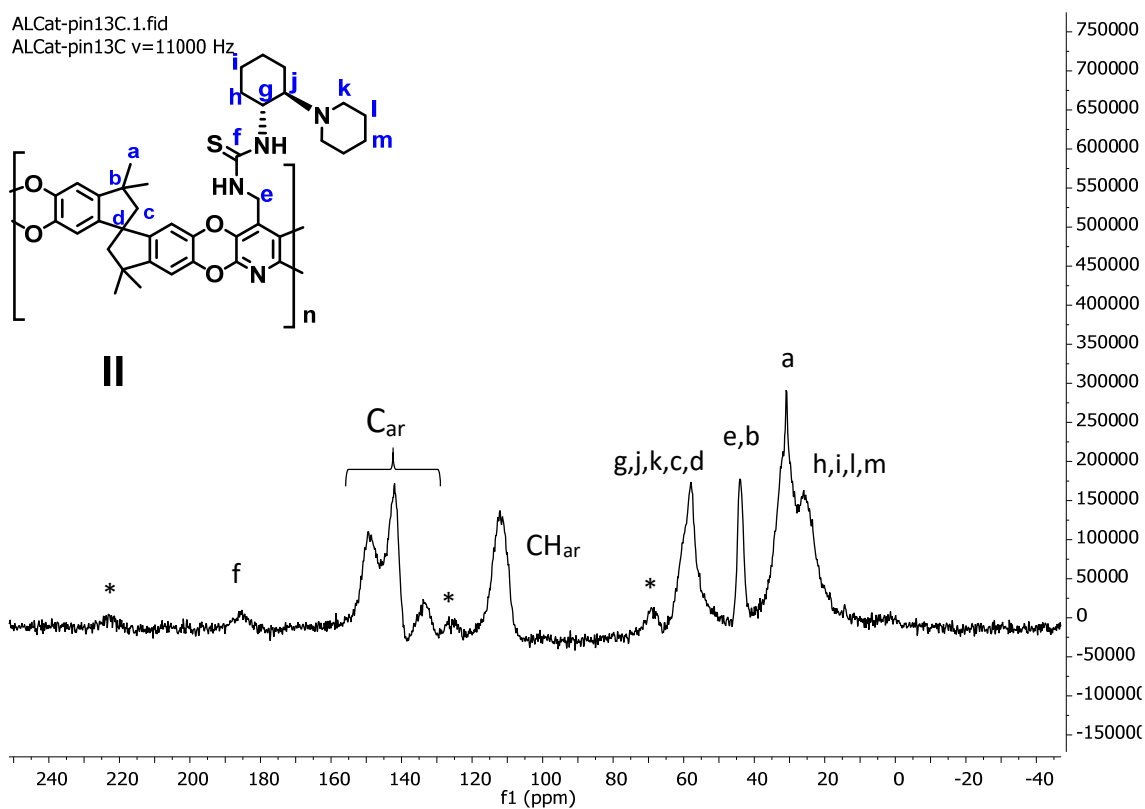

**Figure S3.** <sup>13</sup>C-SS CP/MAS NMR analysis of **Catalyst II**. \*(rotation side bands)

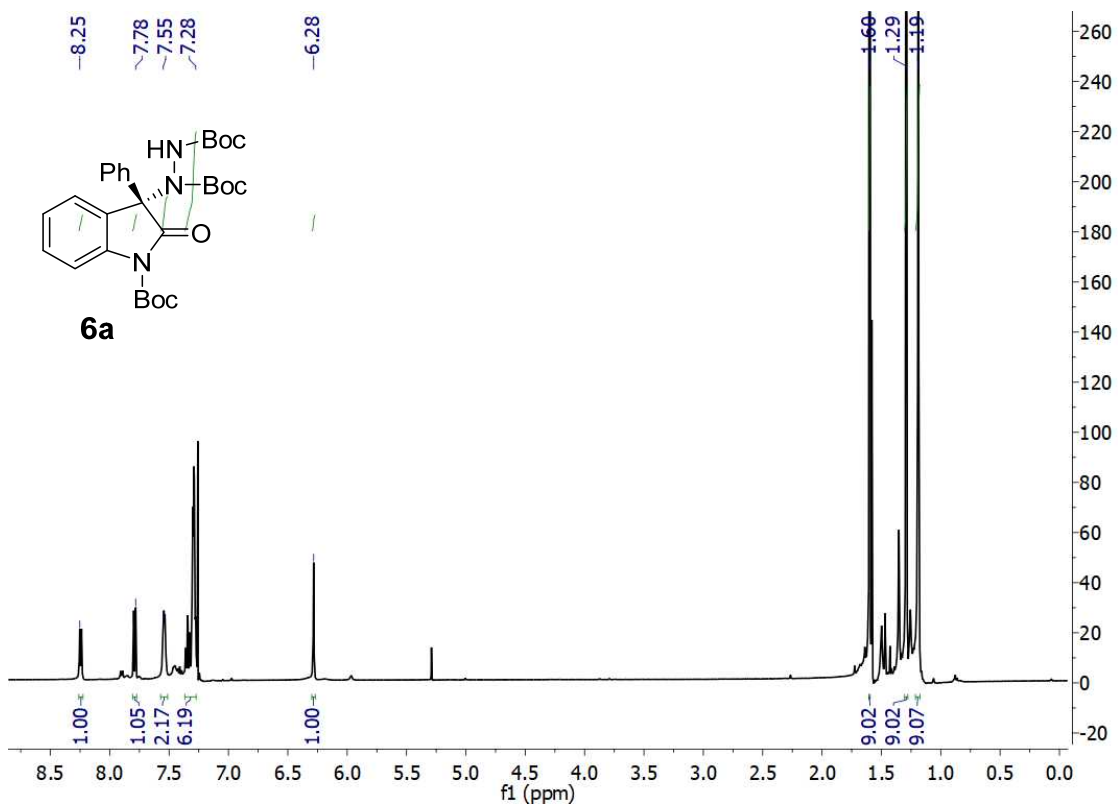

**Figure S4.** <sup>1</sup>H NMR spectrum of **6a** (CDCl<sub>3</sub>, 500 MHz)

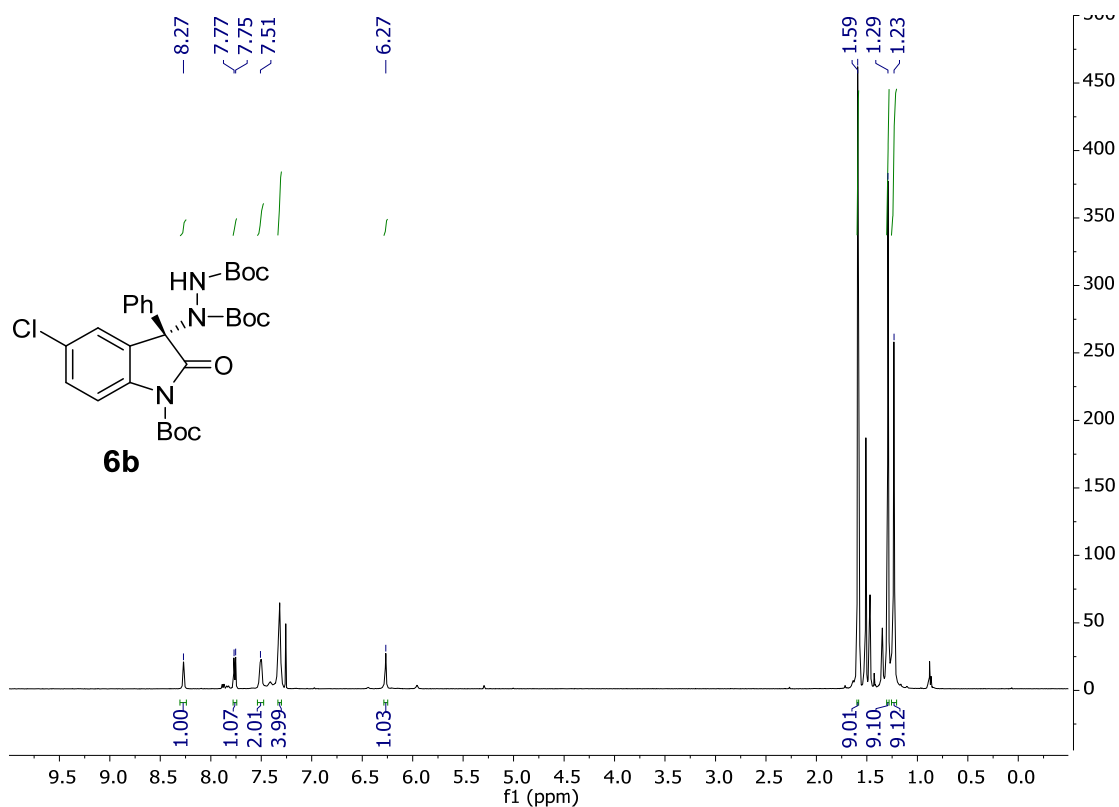

Figure S5. <sup>1</sup>H NMR spectrum of **6b** (CDCl<sub>3</sub>, 400 MHz)

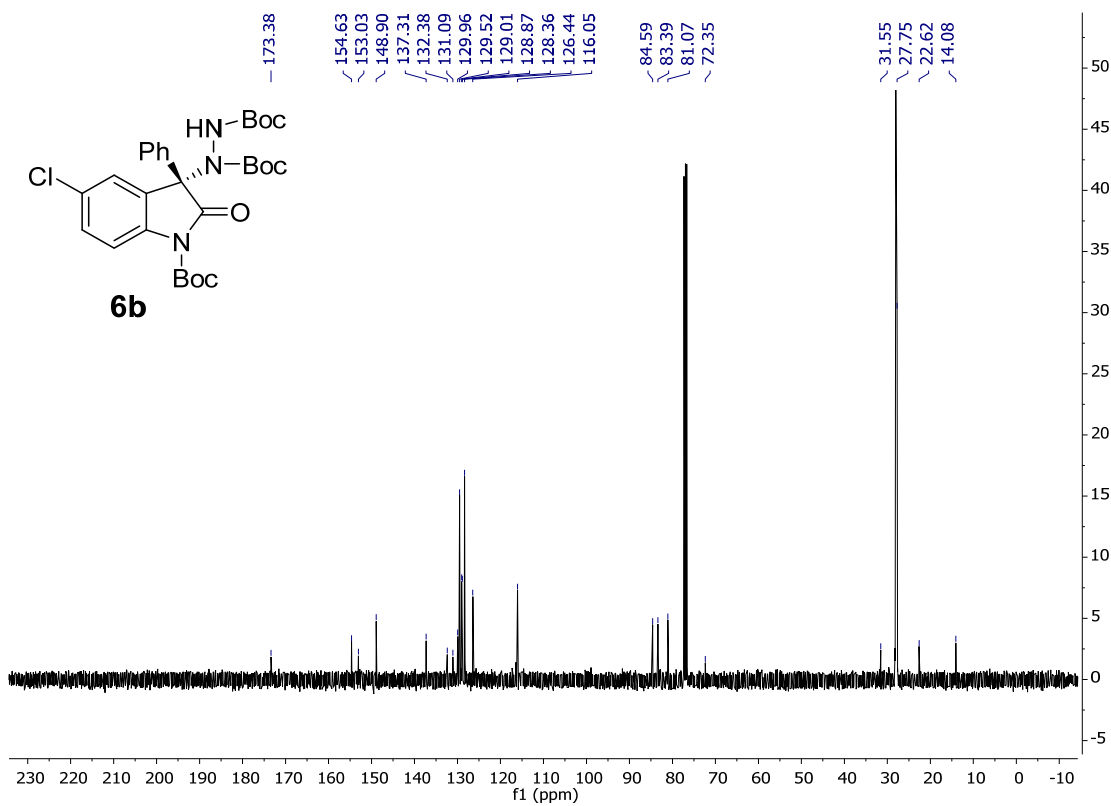

Figure S6. <sup>13</sup>C NMR spectrum of **6b** (CDCl<sub>3</sub>, 100 MHz)

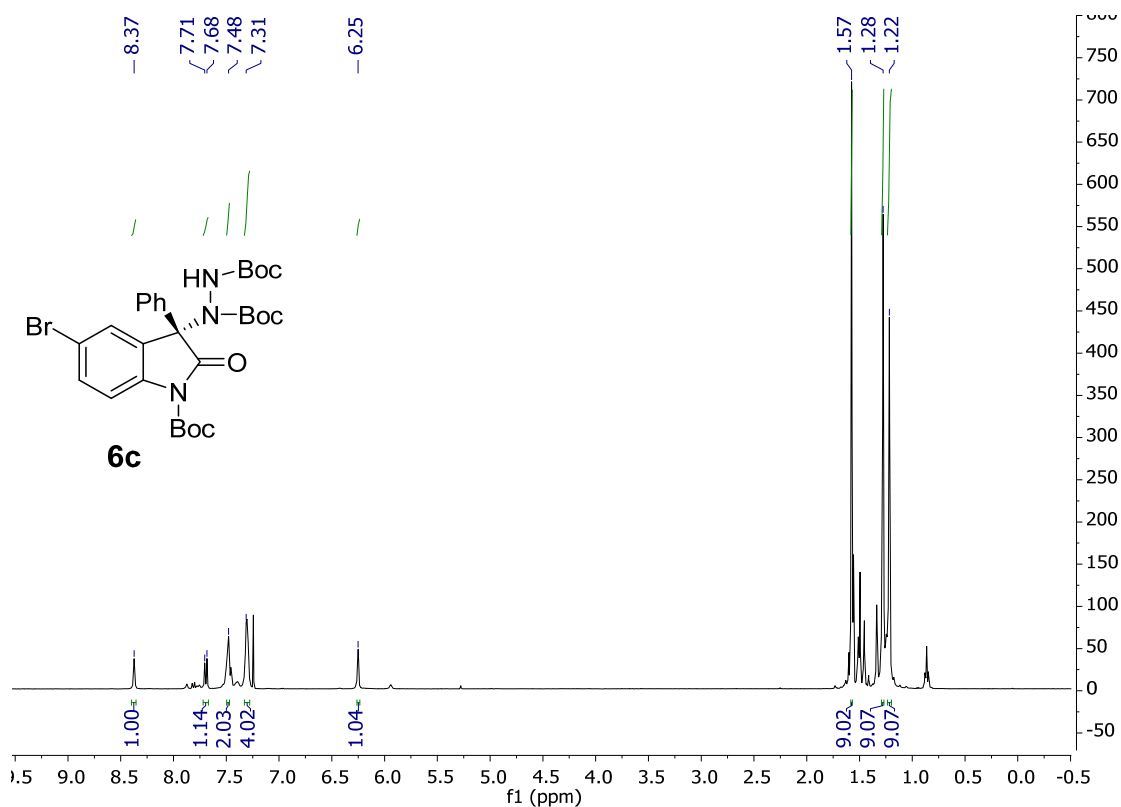

**Figure S7.** <sup>1</sup>H NMR spectrum of **6c** (CDCl<sub>3</sub>, 400 MHz)

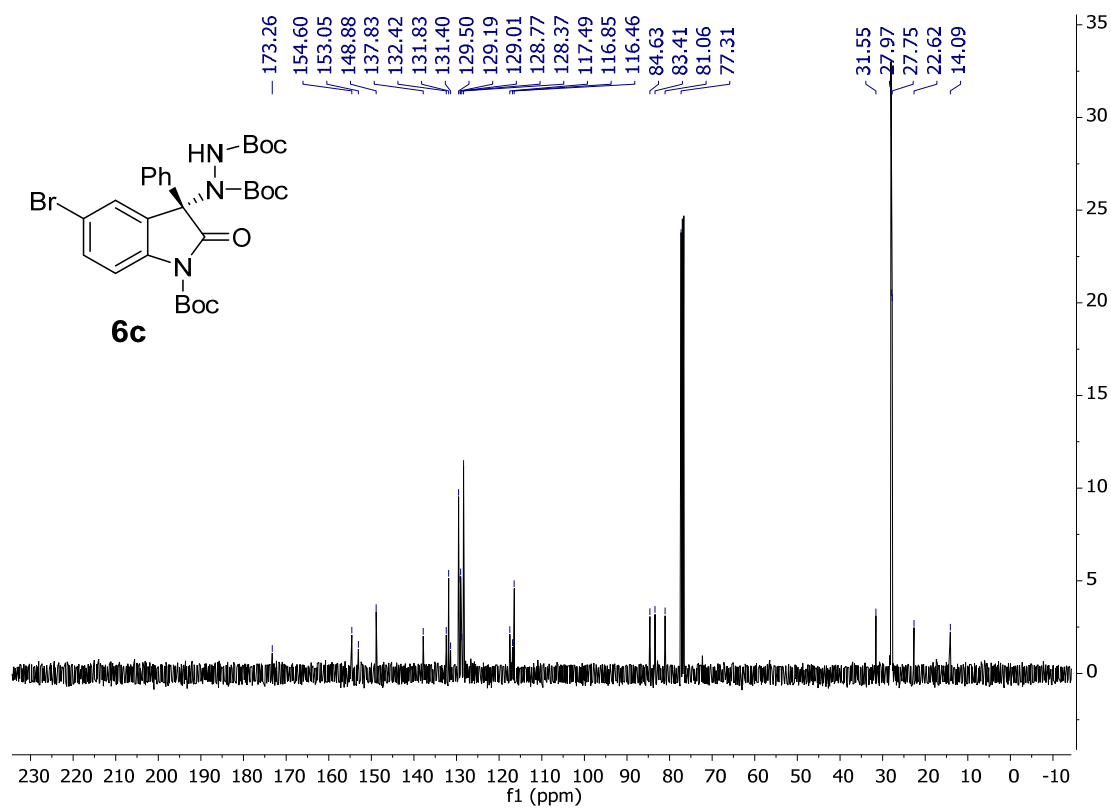

**Figure S8.** <sup>13</sup>C NMR spectrum of **6c** (CDCl<sub>3</sub>, 100 MHz)

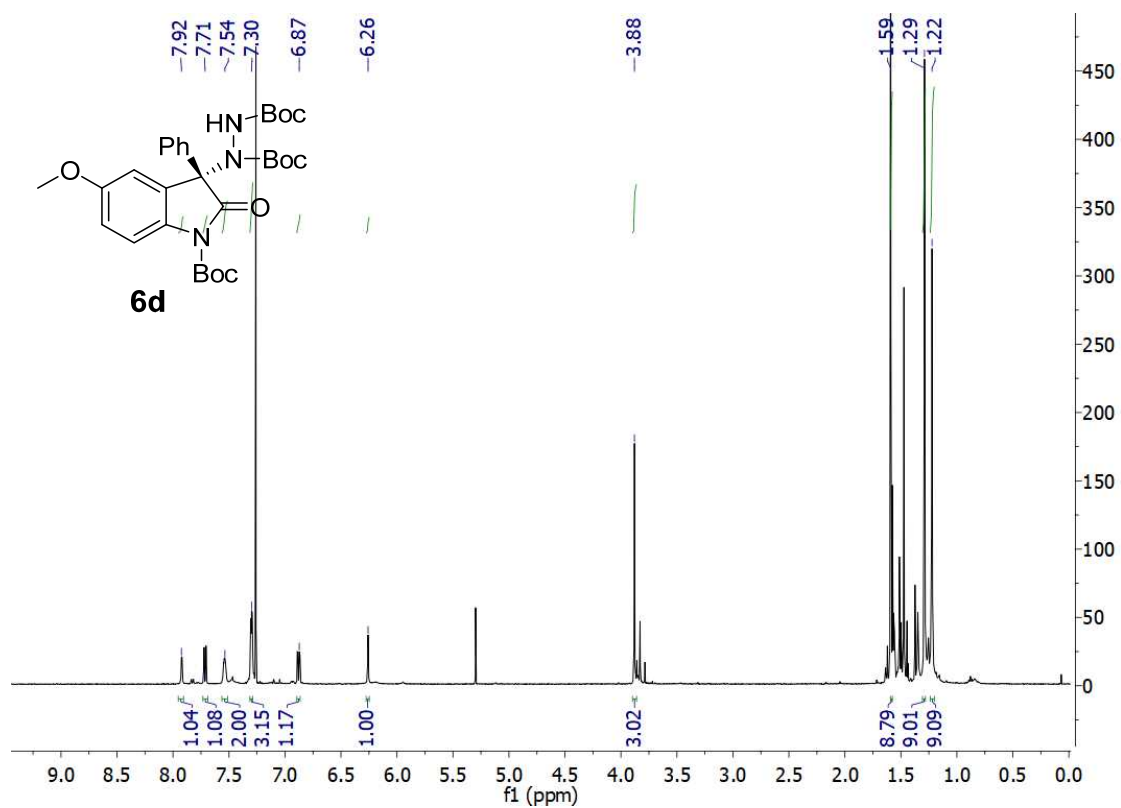

Figure S9. <sup>1</sup>H NMR spectrum of **6d** (CDCl<sub>3</sub>, 500 MHz)

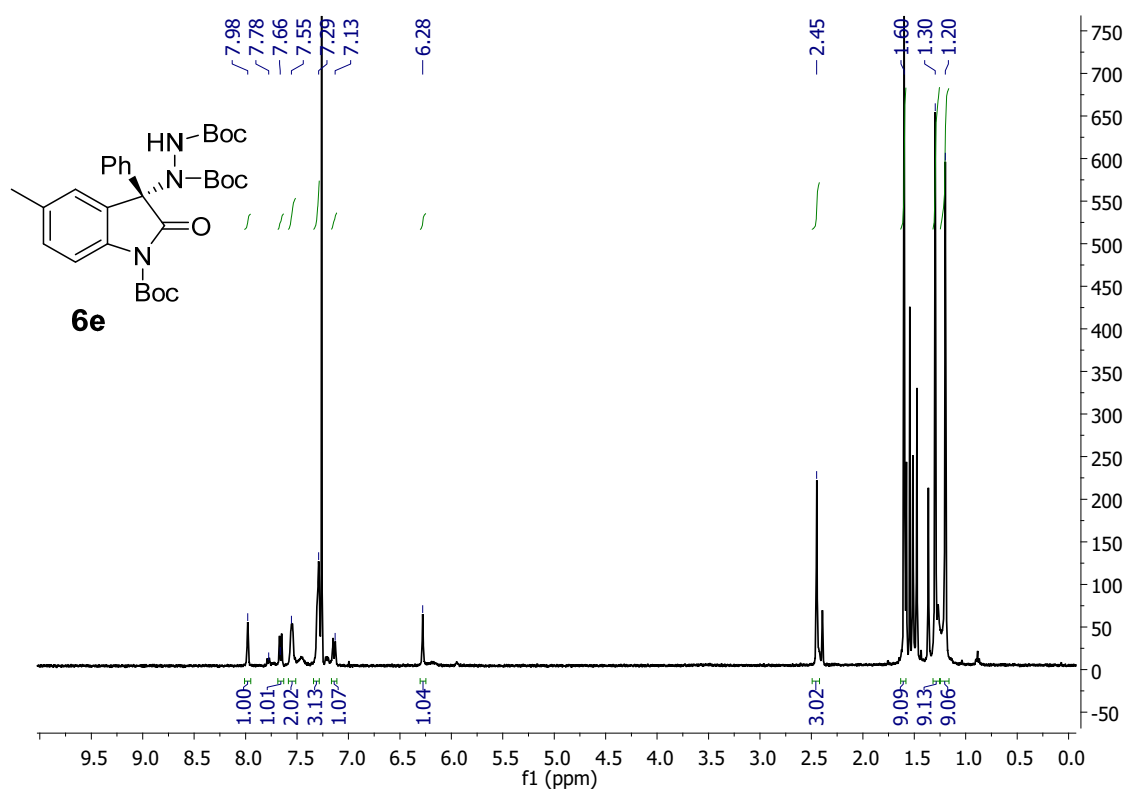

Figure S10. <sup>1</sup>H NMR spectrum of **6e** (CDCl<sub>3</sub>, 400 MHz)

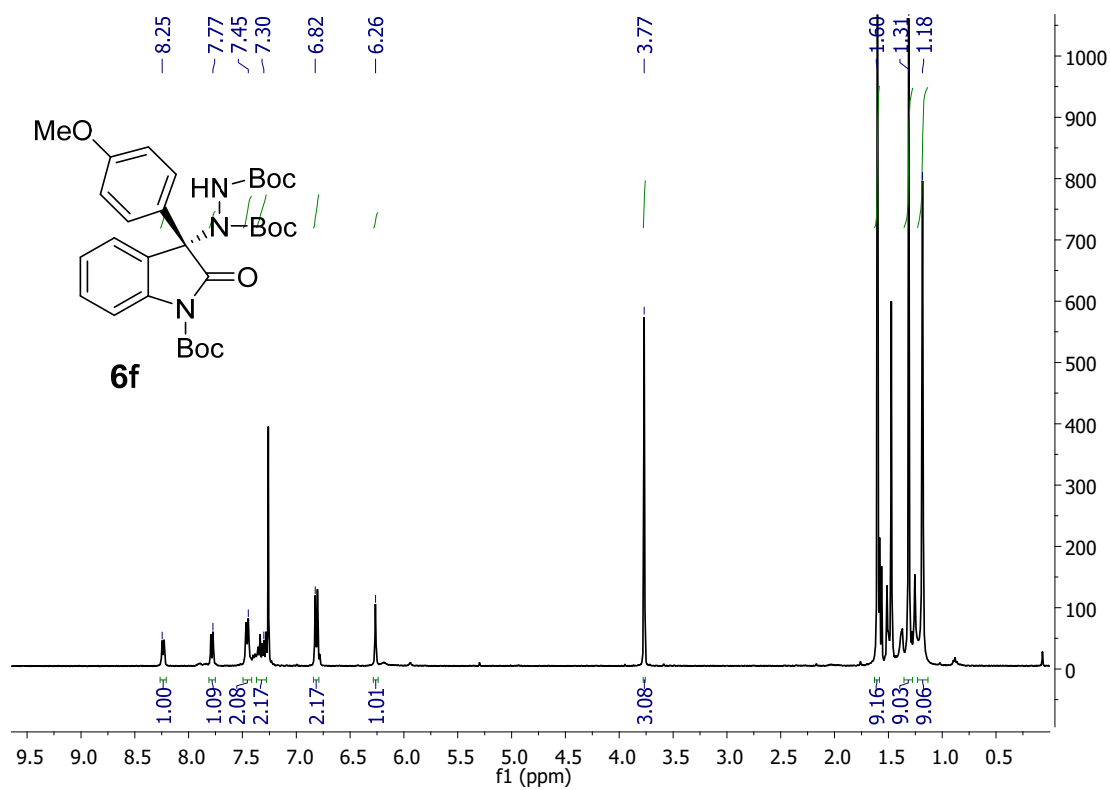

Figure S11. <sup>1</sup>H NMR spectrum of **6f** (CDCl<sub>3</sub>, 400 MHz)

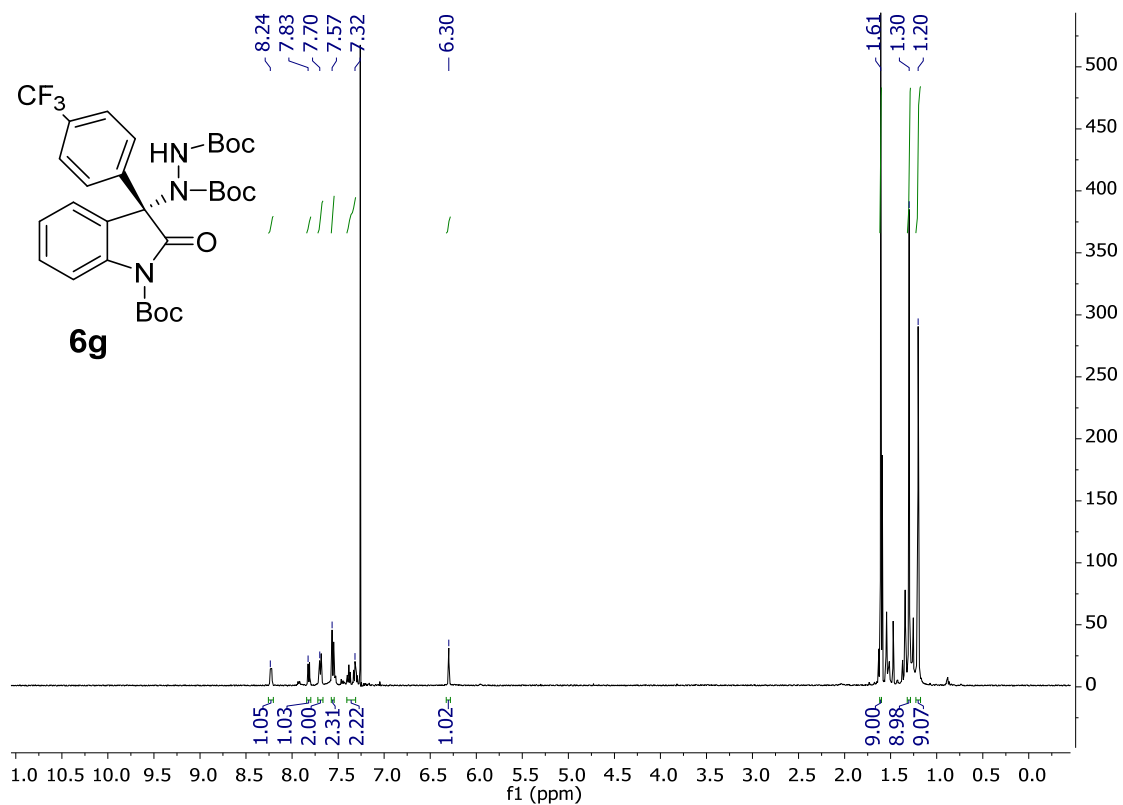

Figure S12. <sup>1</sup>H NMR spectrum of **6g** (CDCl<sub>3</sub>, 400 MHz)



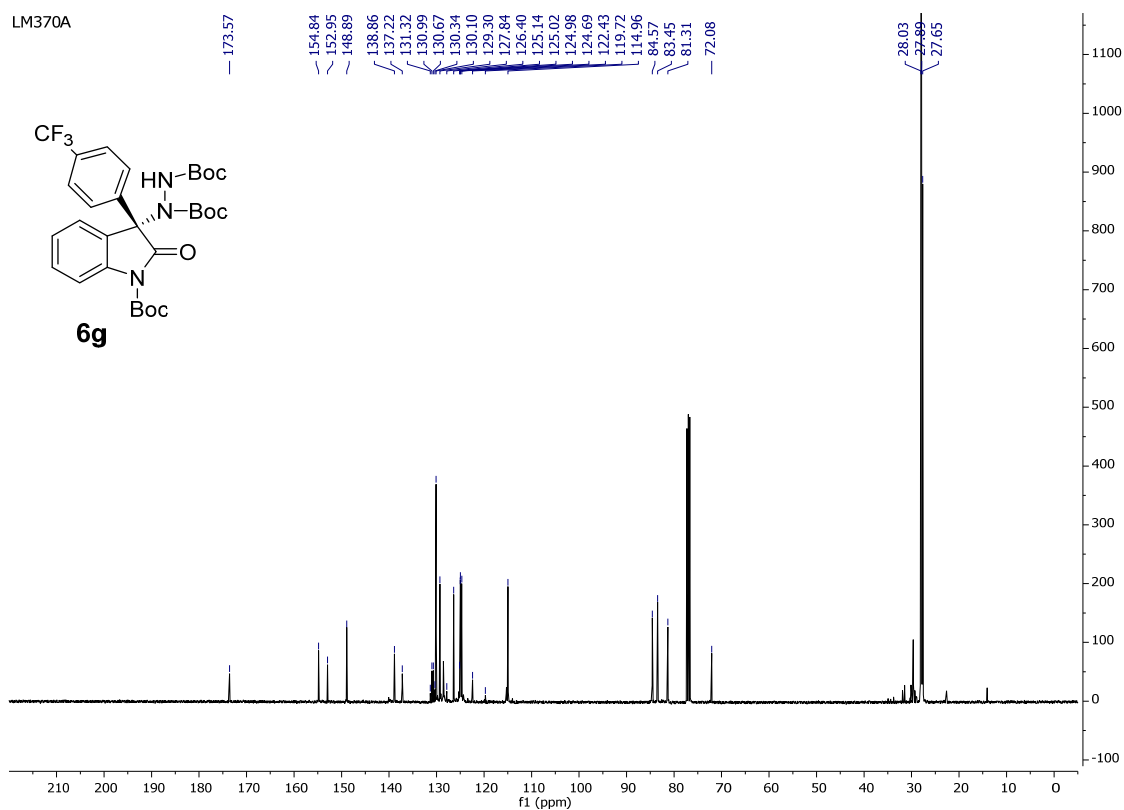

**Figure S13.**  $^{13}\text{C}$  NMR spectrum of **6g** ( $\text{CDCl}_3$ , 100 MHz)

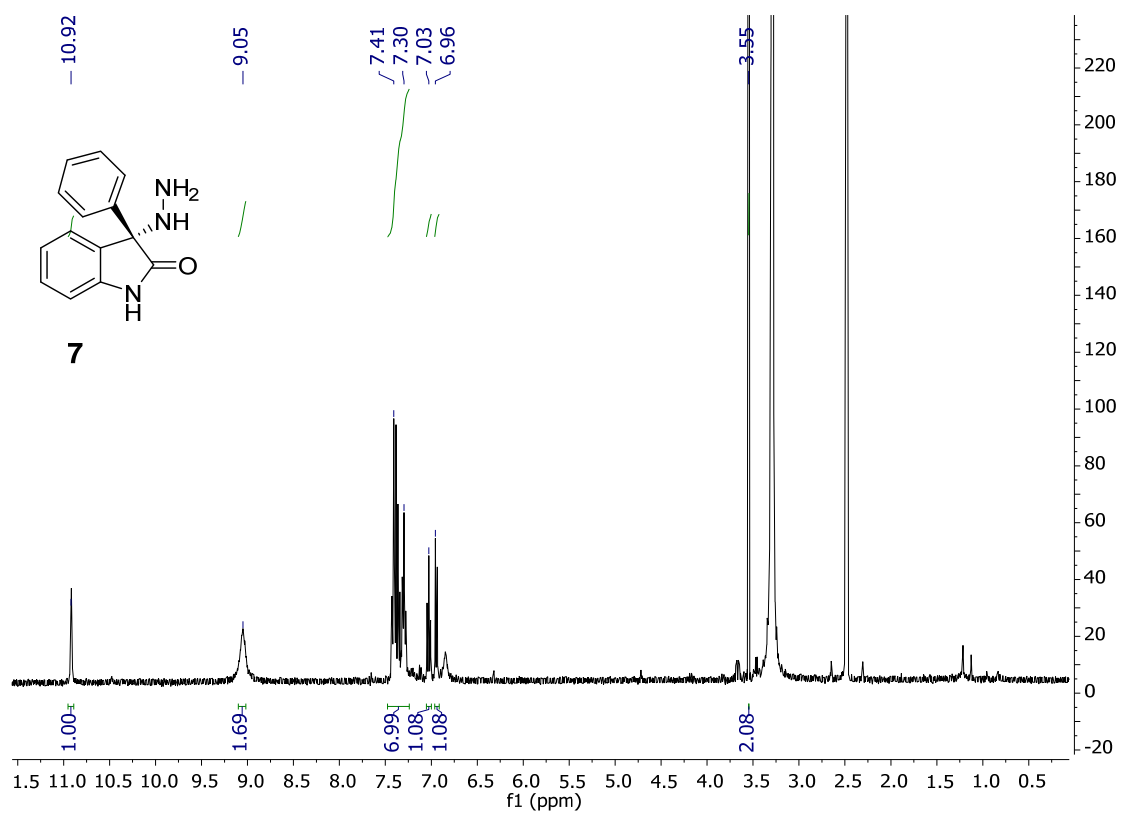

**Figure S14.**  $^1\text{H}$  NMR spectrum of **7** ( $\text{DMSO-d}_6$ , 400 MHz)

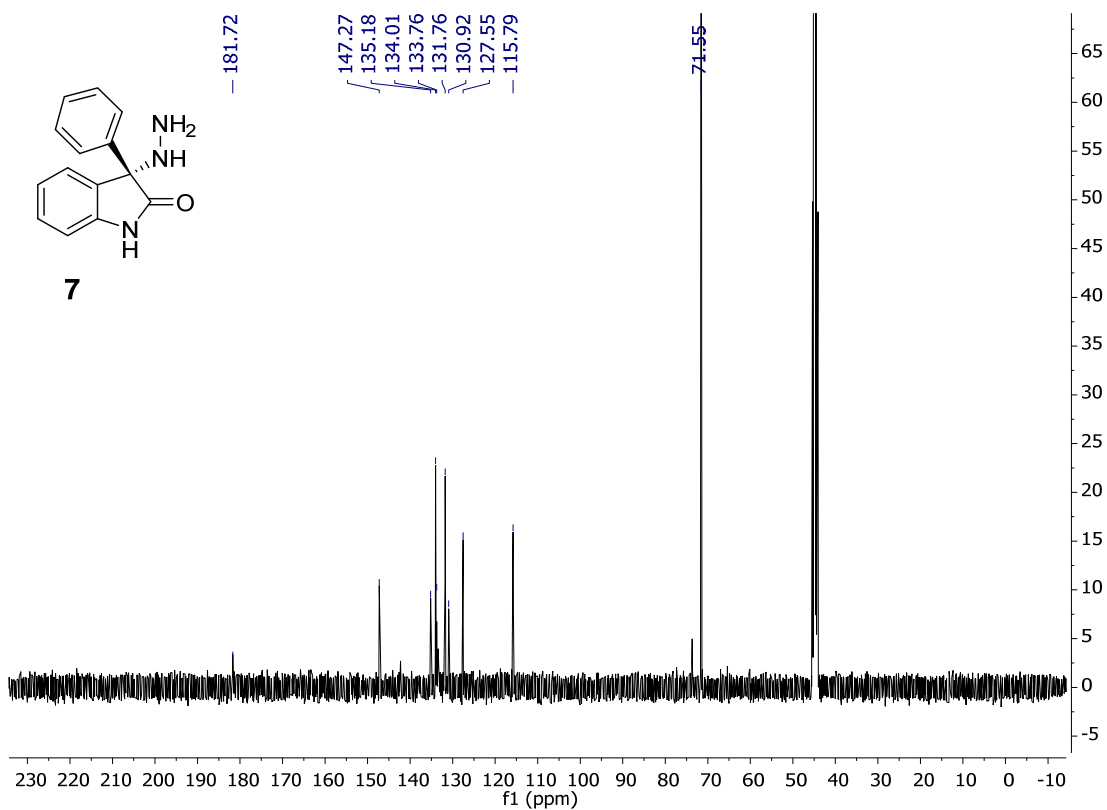

**Figure S15.**  $^{13}\text{C}$  NMR spectrum of **7** (DMSO- $d_6$ , 100 MHz)

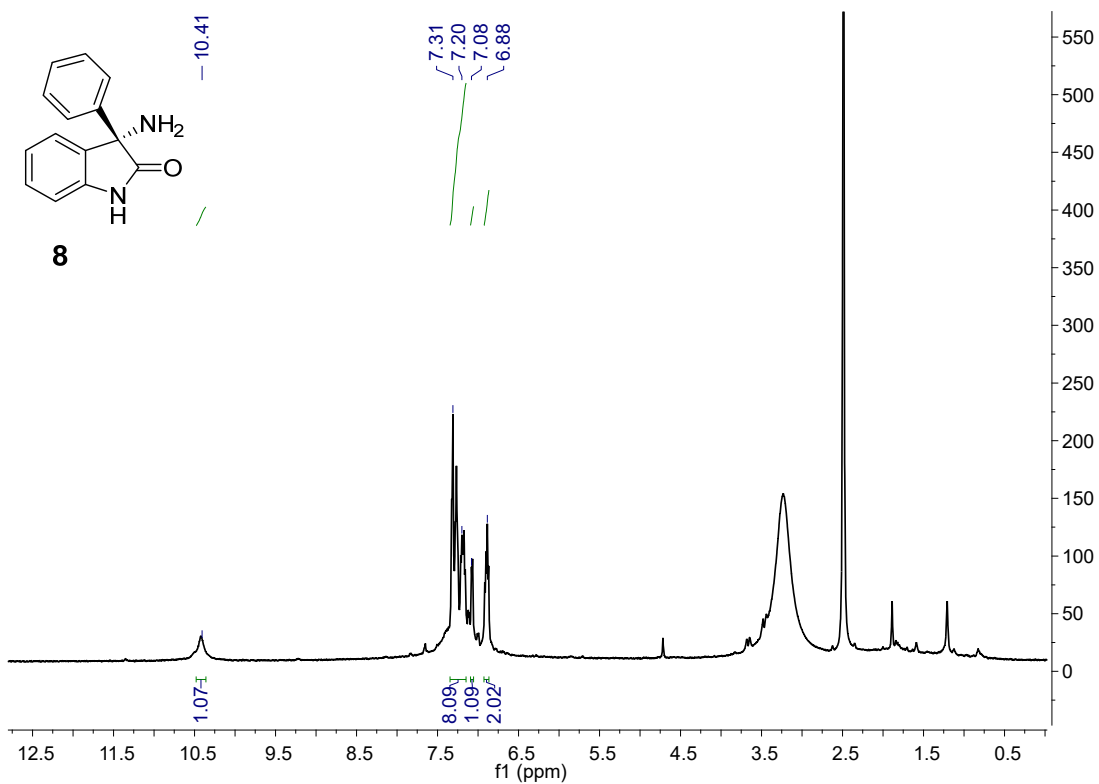

**Figure S16.**  $^1\text{H}$  NMR spectrum of **8** (DMSO- $d_6$ , 500 MHz)

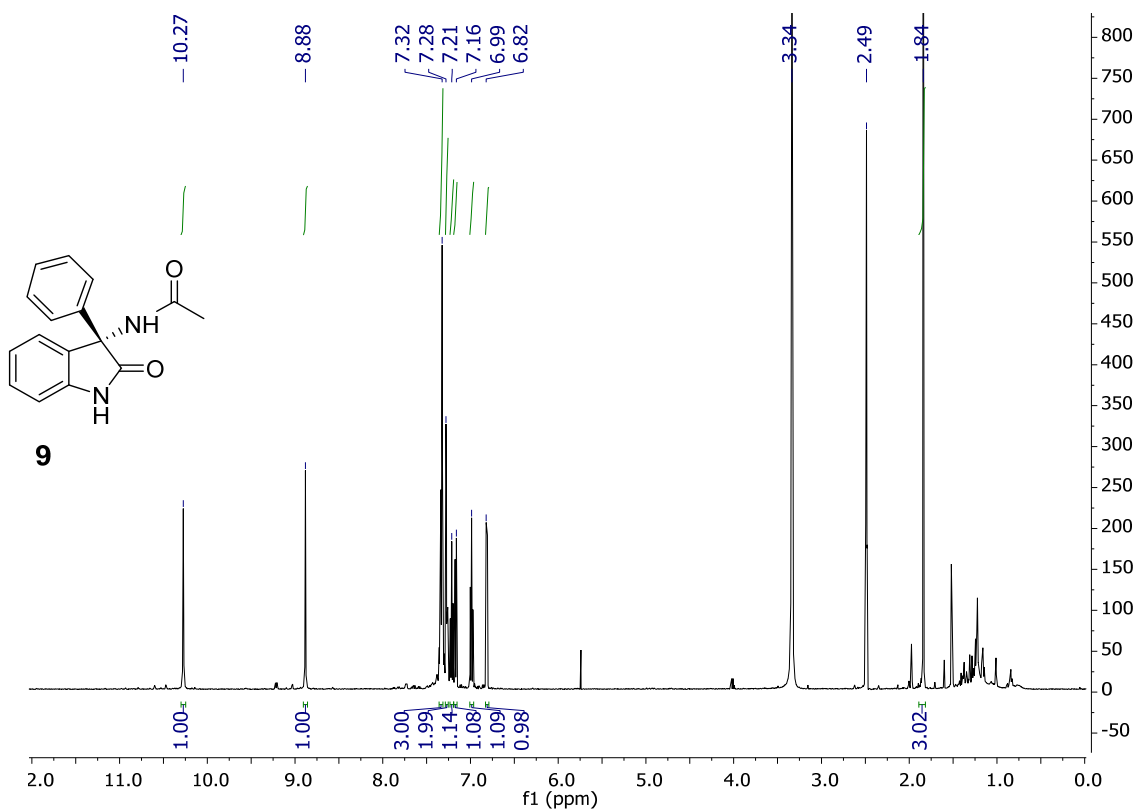

**Figure S17.**  $^1\text{H}$  NMR spectrum of **9** (DMSO- $d_6$ , 500 MHz)

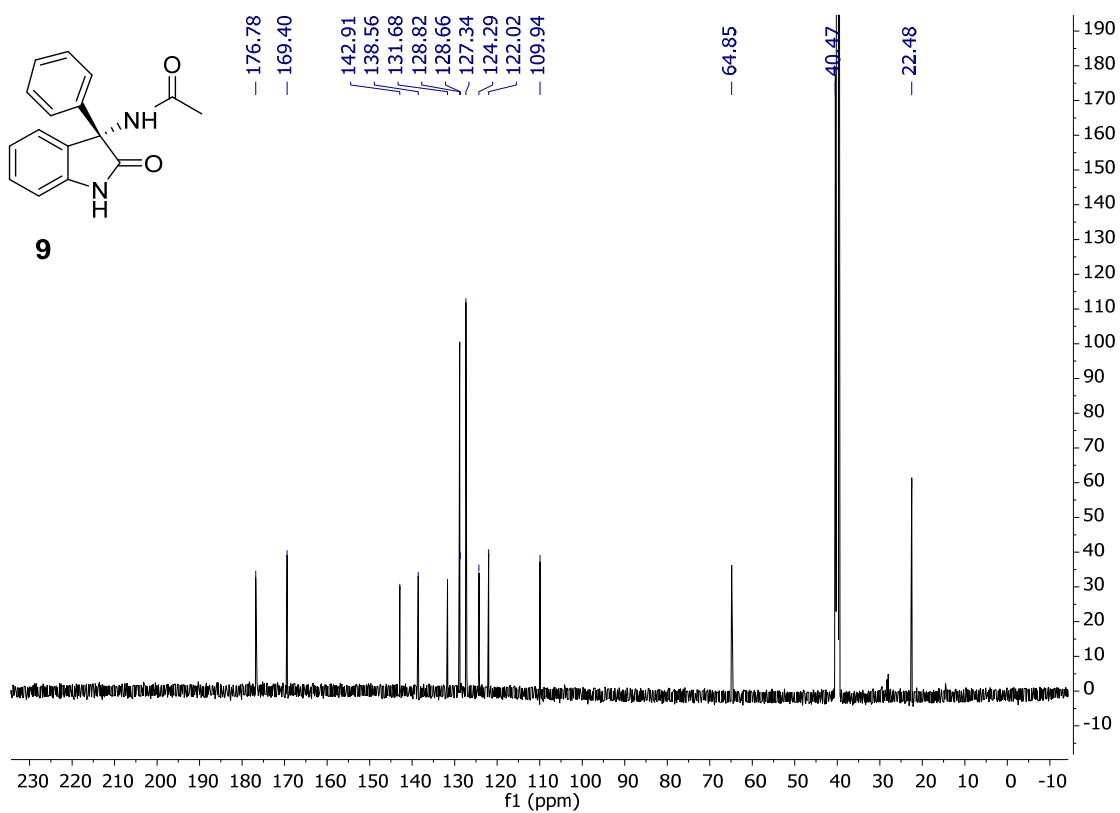

**Figure S18.**  $^{13}\text{C}$  NMR spectrum of **9** (DMSO- $d_6$ , 126 MHz)

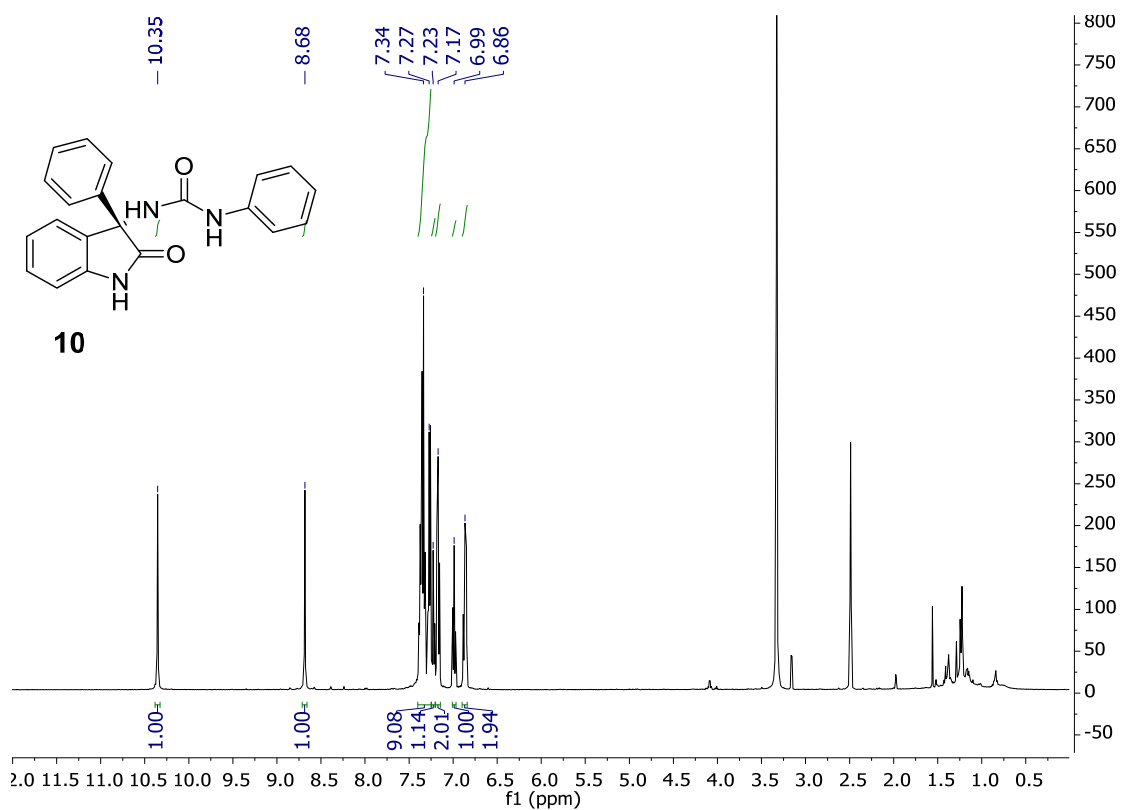

**Figure S19.** <sup>1</sup>H NMR spectrum of **10** (DMSO-d<sub>6</sub>, 500 MHz)

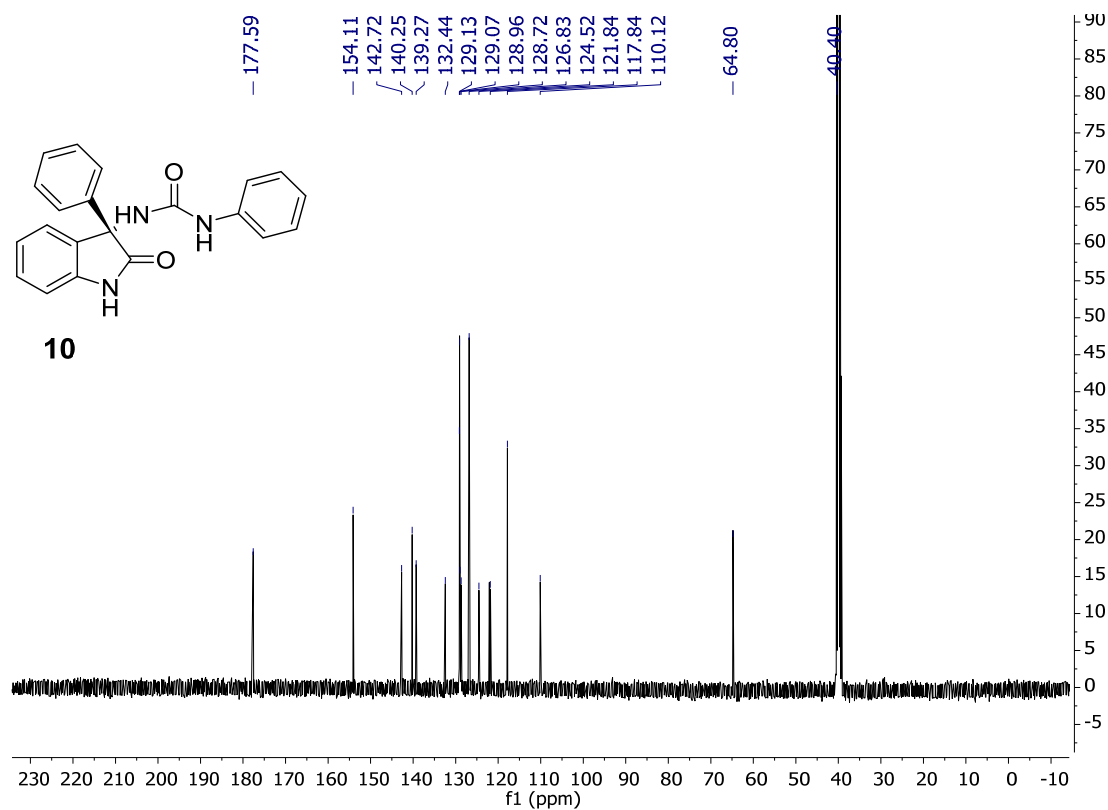

**Figure S20.** <sup>13</sup>C NMR spectrum of **10** (DMSO-d<sub>6</sub>, 100 MHz)

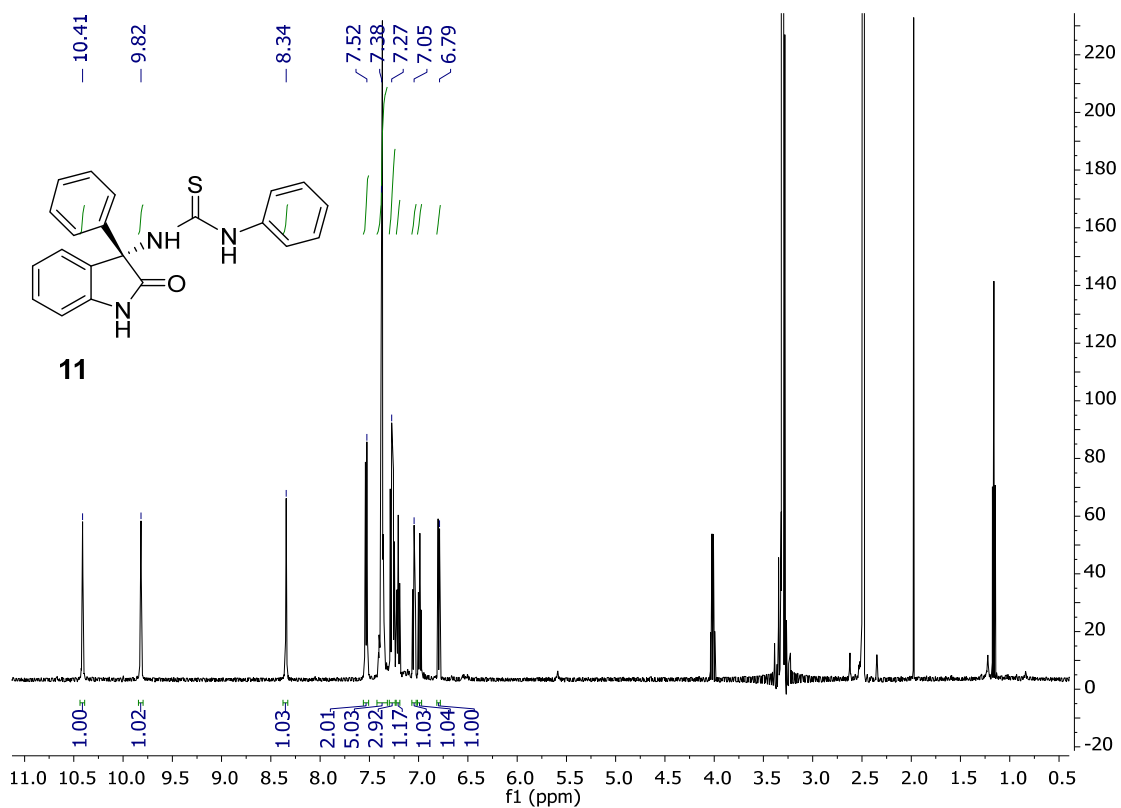

**Figure S21.** <sup>1</sup>H NMR spectrum of **11** (DMSO-d<sub>6</sub>, 500 MHz)

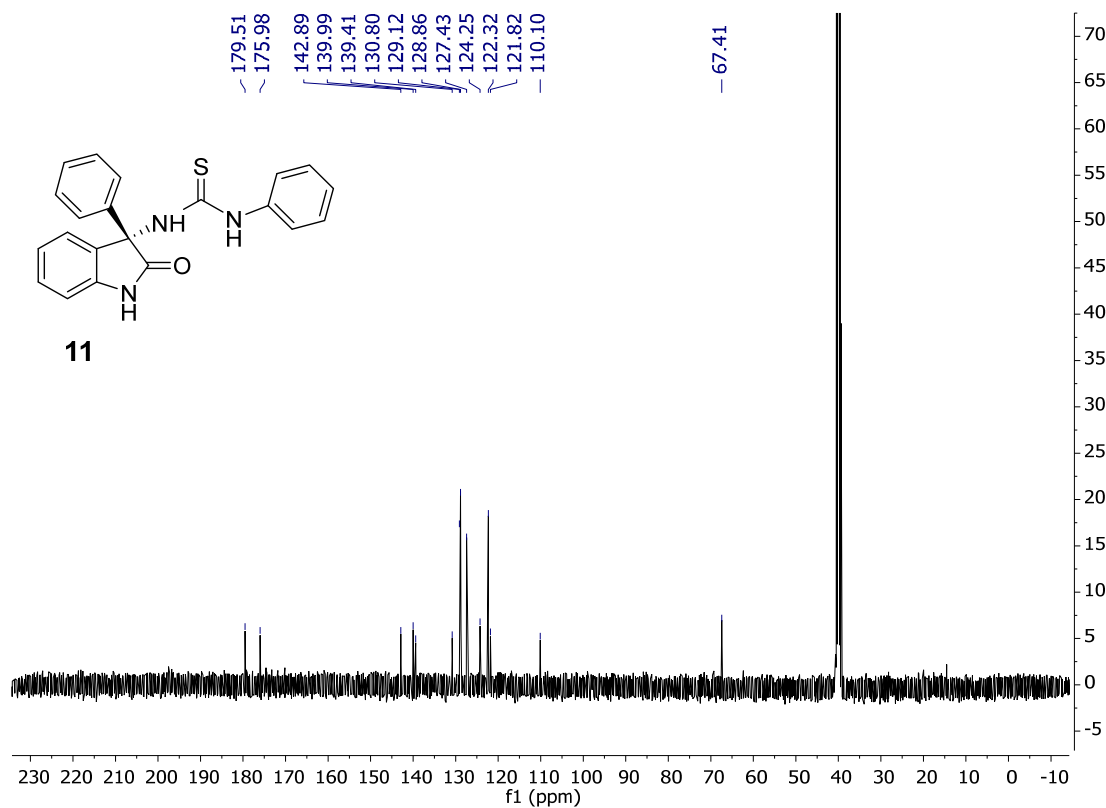

**Figure S22.** <sup>13</sup>C NMR spectrum of **11** (DMSO-d<sub>6</sub>, 100 MHz)

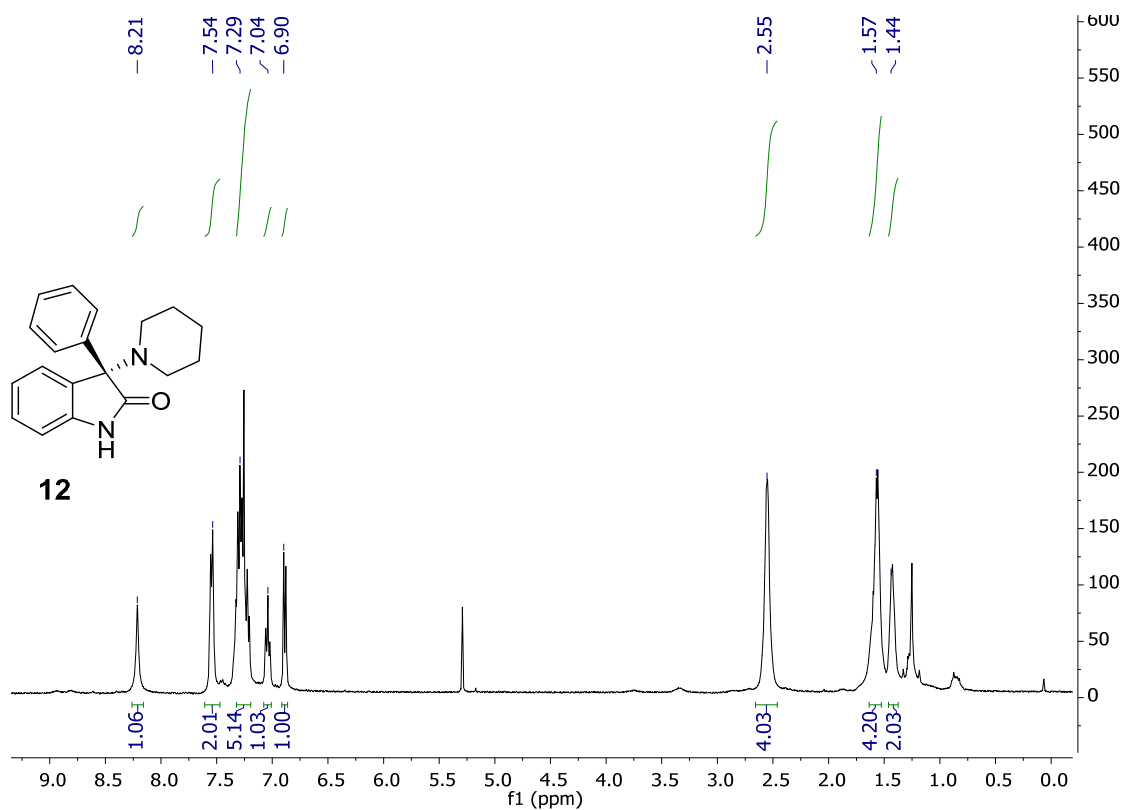

**Figure S23.**  $^1\text{H}$  NMR spectrum of **12** ( $\text{CDCl}_3$ , 400 MHz)

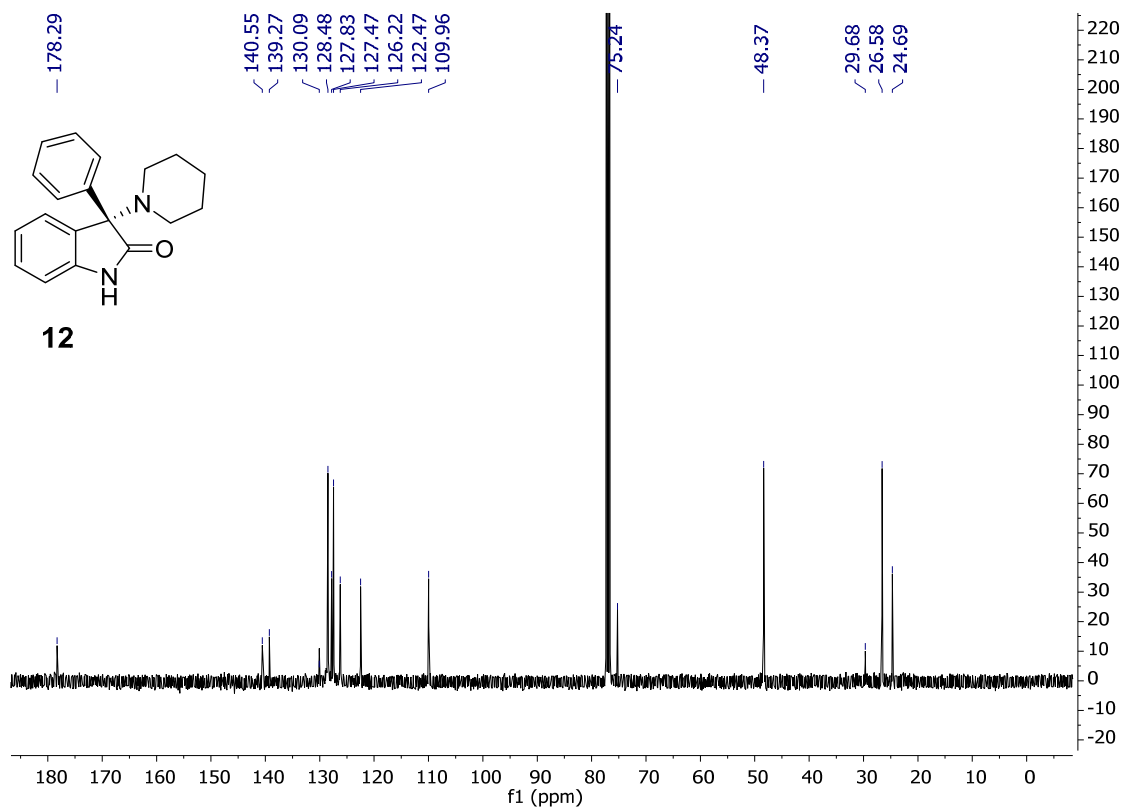

**Figure S24.**  $^{13}\text{C}$  NMR spectrum of **12** ( $\text{CDCl}_3$ , 100 MHz)

## 2.-NMR spectra of crude mixtures in toluene and dicloromethane

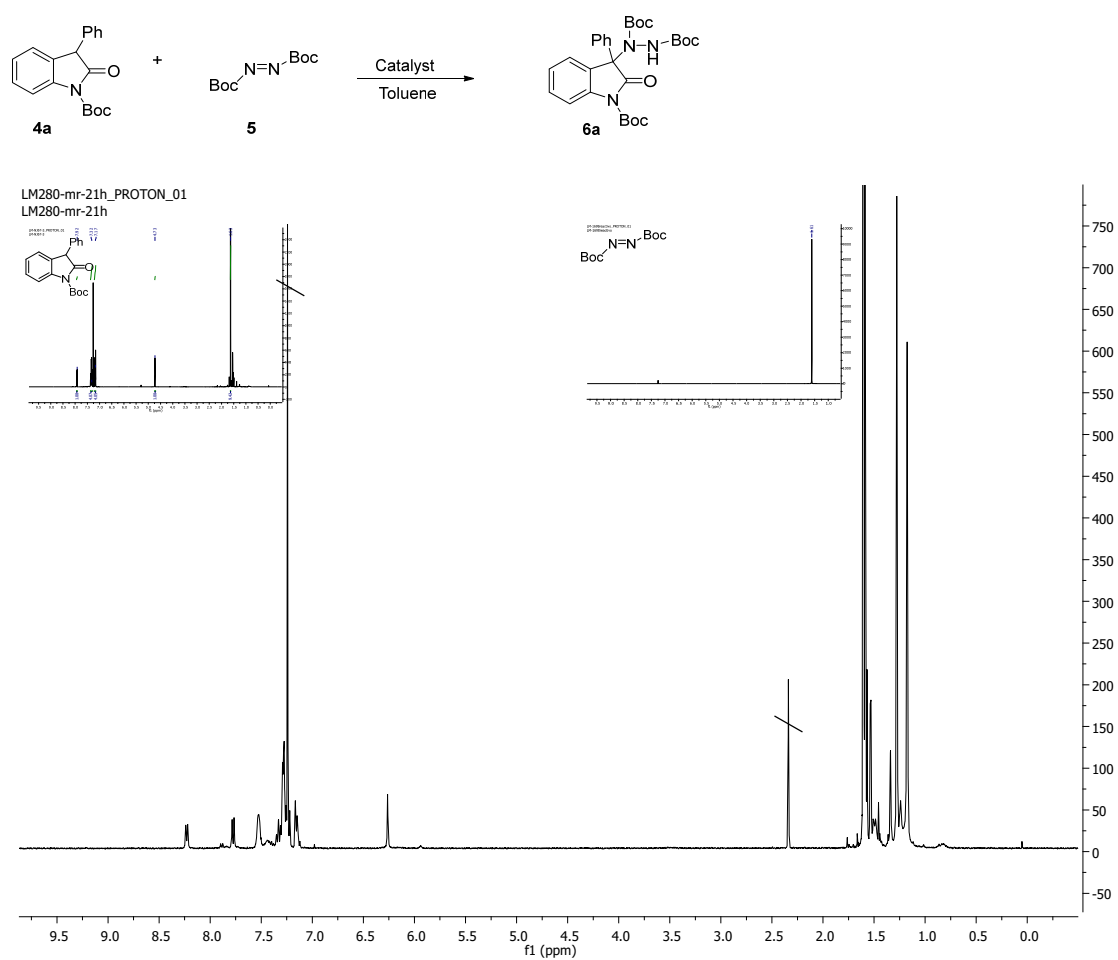

**Figure S25.**  $^1\text{H}$  NMR spectrum of crude mixture of **6a** in toluene ( $\text{CDCl}_3$ , 400 MHz)

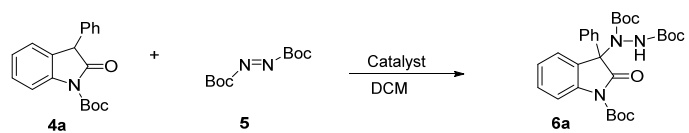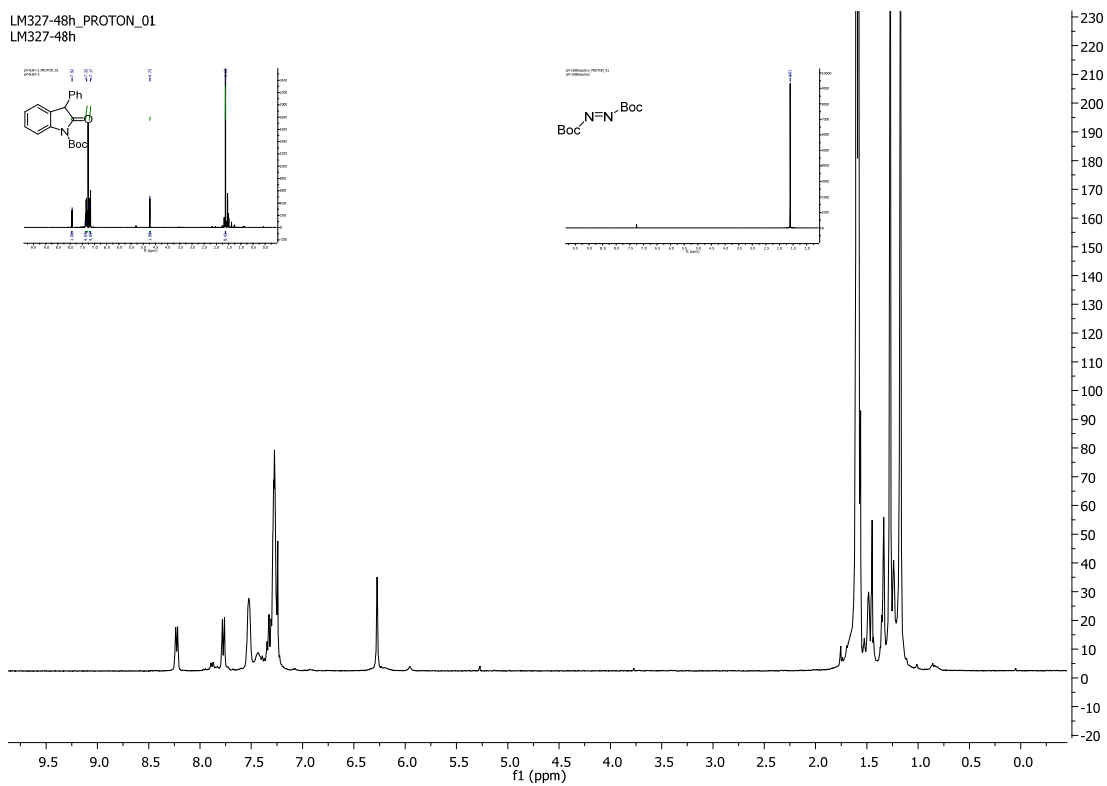

**Figure S26.**  $^1\text{H}$  NMR spectrum of crude mixture of **6a** in dichloromethane ( $\text{CDCl}_3$ , 400 MHz)



### 3.- IR (PIM-1n, Amine PIM-1n and catalyst II) spectra

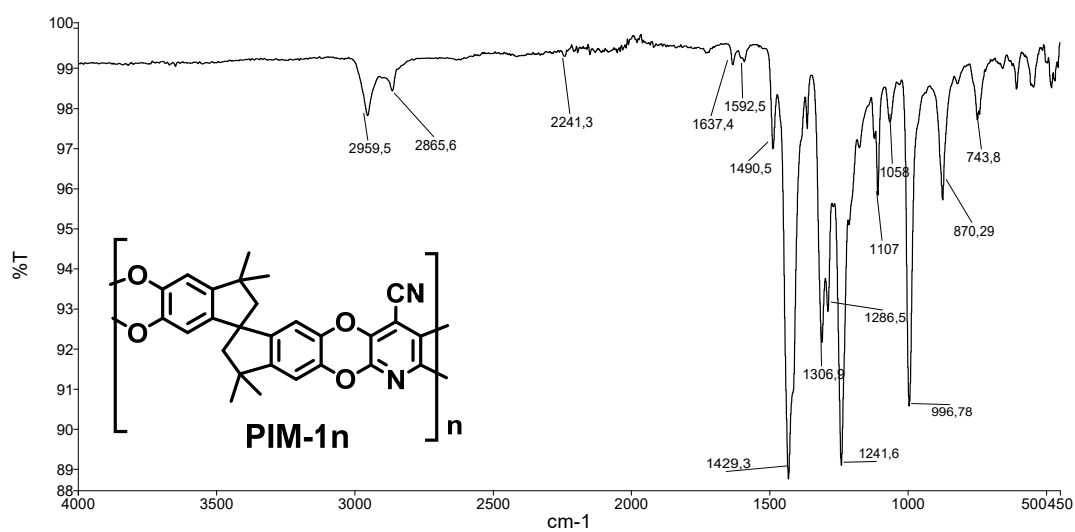

Figure S27. IR (ATR) for PIM-1n

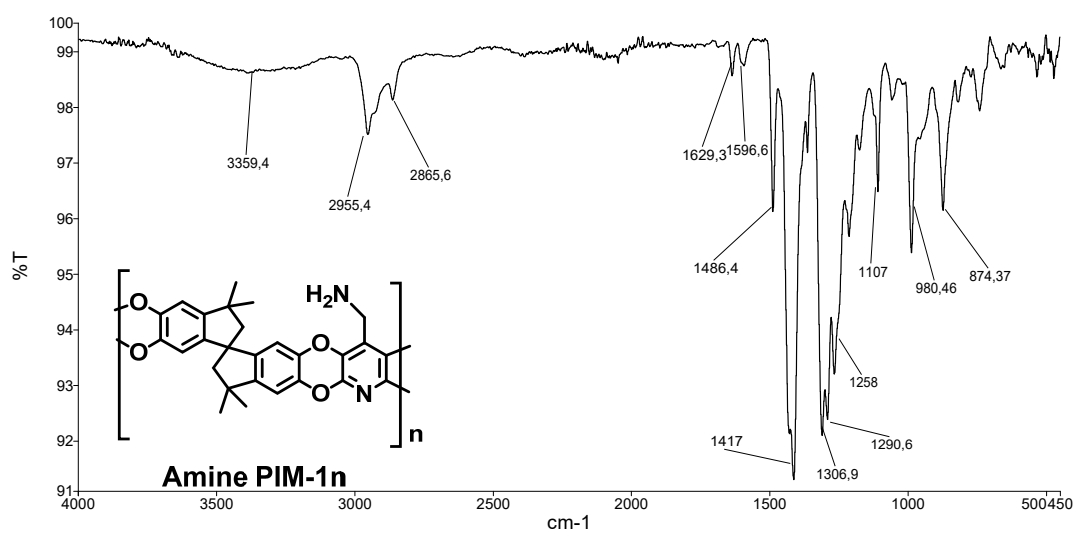

Figure S28. IR (ATR) for Amine PIM-1n

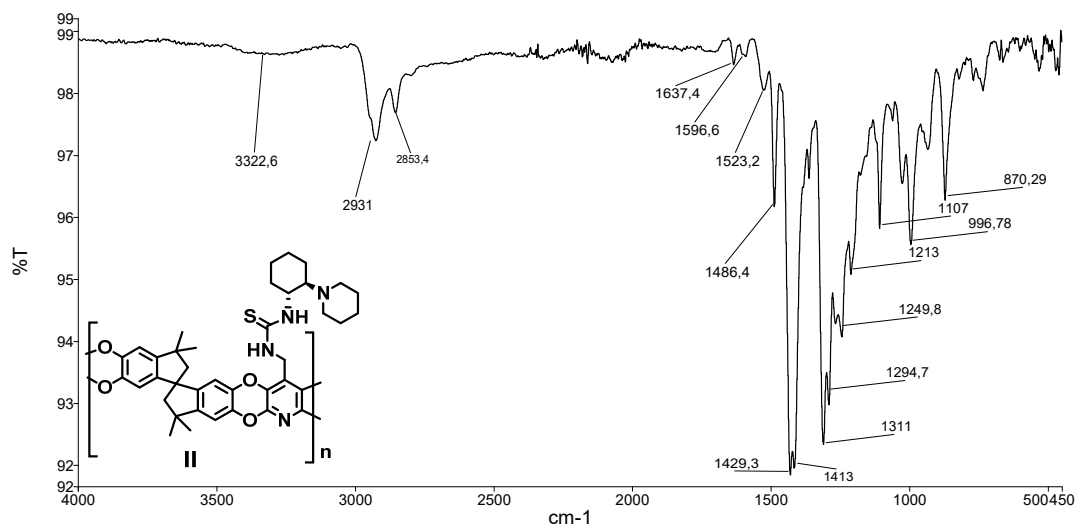

Figure S29. IR (ATR) for thiourea II (catalyst II)

4.- TGA analysis (PIM-1n, Amine PIM-1n, catalyst II)

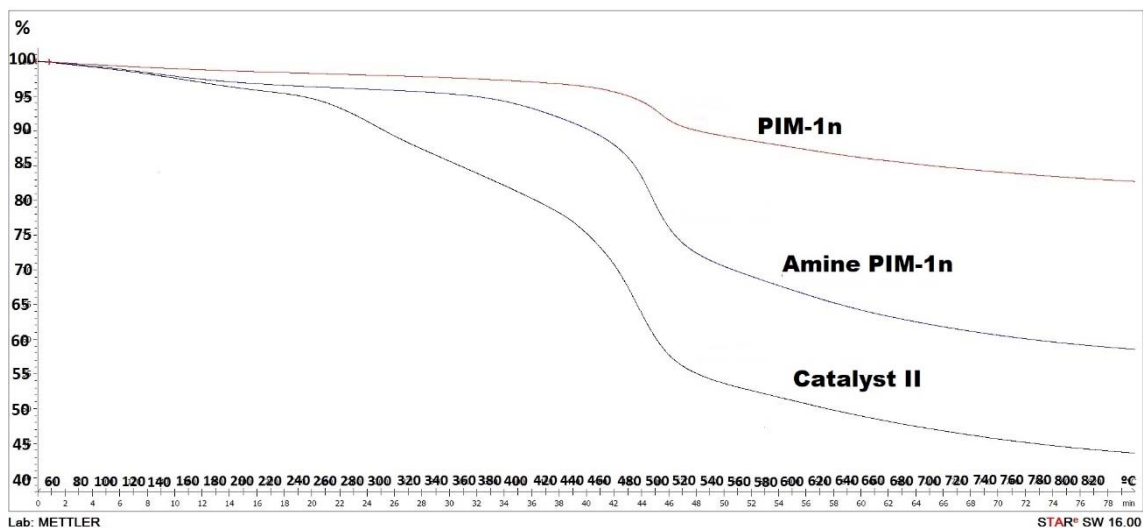

Figure S30. TGA thermograms comparison of PIM-1n, Amine PIM-1n and catalyst II under nitrogen atmosphere.

## 5.- BET analysis and SEM micrographs (Catalyst II)

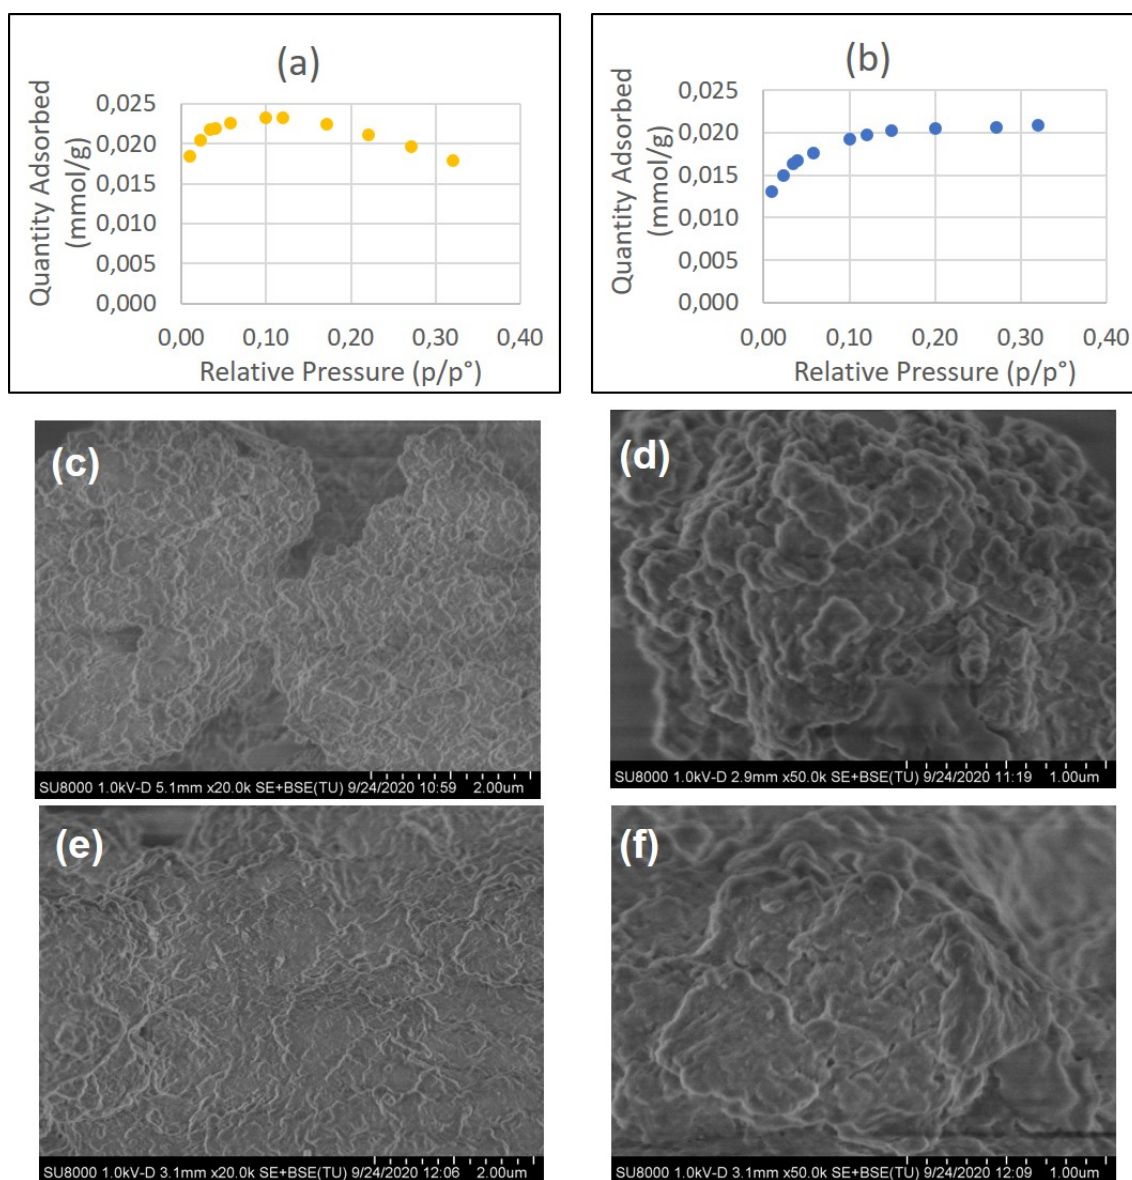

**Figure S31.** N<sub>2</sub> adsorption isotherms of the dry powder catalyst **II** before (a) and after (b) used in flow conditions. SEM micrographs of dry powder catalyst **II** before (c, d) and after (e, f) used in flow conditions.

## 6.- HPLC chromatograms

(*S*)-Di-*tert*-butyl-1-[1-(*tert*-butoxycarbonyl)-2-oxo-3-phenylindolin-3-yl]hydrazine-1,2-dicarboxylate (**6a**).

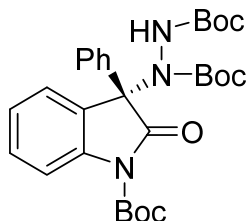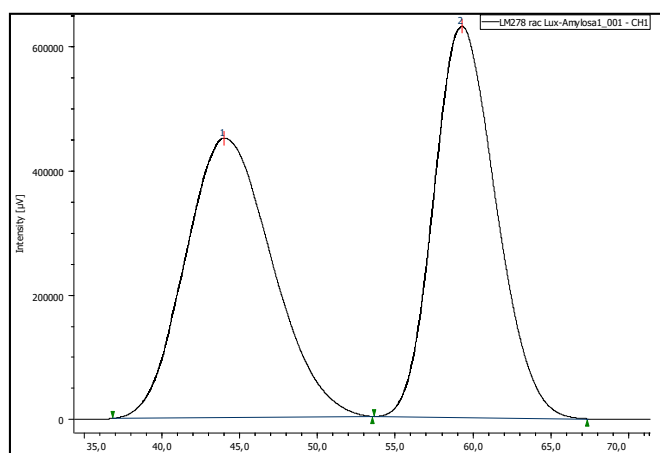

| Peak Name | <i>t<sub>R</sub></i> | Area      | Height | Area%         | Height% | Symmetry |
|-----------|----------------------|-----------|--------|---------------|---------|----------|
| 1         | <b>43,992</b>        | 174300373 | 449637 | <b>49,900</b> | 41,689  | 1,172    |
| 2         | <b>59,267</b>        | 174997518 | 628907 | <b>50,100</b> | 58,311  | 1,168    |

Figure S32. HPLC profile for **6a** (racemic).

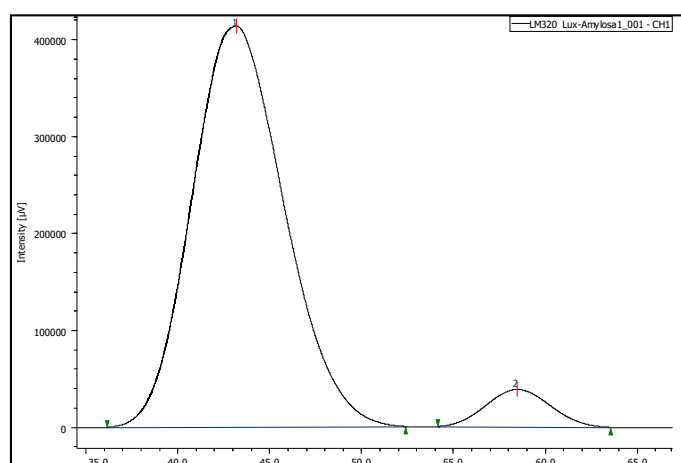

| Peak Name | <i>t<sub>R</sub></i> | Area      | Height | Area%         | Height% | Symmetry |
|-----------|----------------------|-----------|--------|---------------|---------|----------|
| 1         | <b>43,158</b>        | 144295895 | 412662 | <b>93,842</b> | 91,413  | 1,128    |
| 2         | <b>58,450</b>        | 9468326   | 38762  | <b>6,158</b>  | 8,587   | 1,057    |

Figure S33. HPLC profile for **6a**. Entry 8, table 1. 94:6 er.

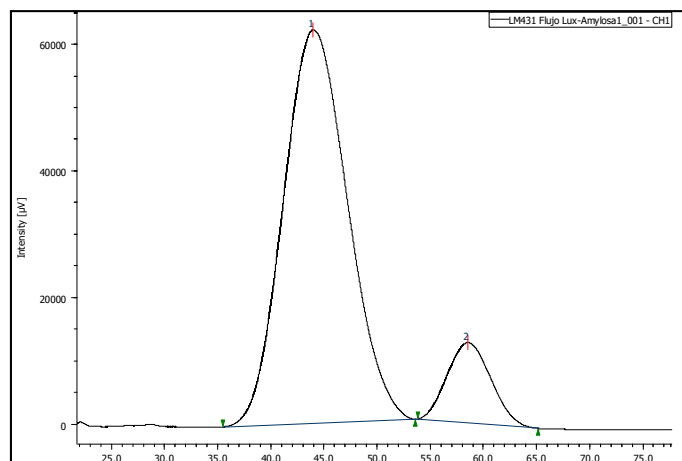

| Peak Name | tR            | Area     | Height | Area%         | Height% | Symmetry |
|-----------|---------------|----------|--------|---------------|---------|----------|
| 1         | <b>43,933</b> | 26002195 | 62001  | <b>87,814</b> | 83,009  | 1,121    |
| 2         | <b>58,517</b> | 3608435  | 12691  | <b>12,186</b> | 16,991  | 1,095    |

**Figure S34.** HPLC profile for **6a** (flow experiments). Entry 1, table 2. 88:12 er.

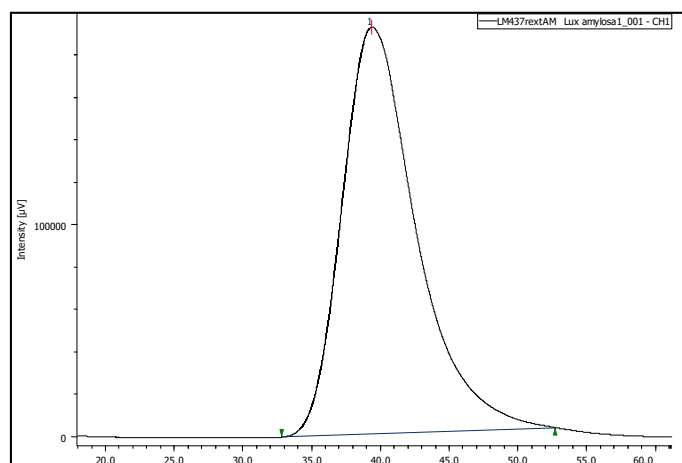

| Peak Name | tR            | Area     | Height | Area%          | Height% | Symmetry |
|-----------|---------------|----------|--------|----------------|---------|----------|
| 1         | <b>39,358</b> | 71893883 | 191518 | <b>100,000</b> | 100,000 | 1,463    |

**Figure S35.** HPLC profile for **6a** after recrystallization.  $\geq 98:2$  er.

**(S)-Di-tert-butyl-1-[1-(tert-butoxycarbonyl)-5-chloro-2-oxo-3-phenylindolin-3-yl]hydrazine-1,2-dicarboxylate (6b).**

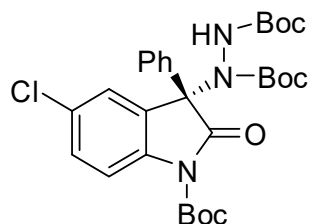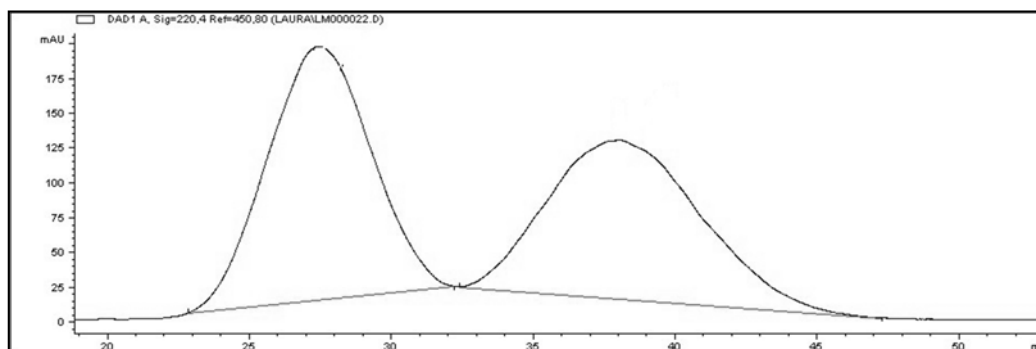

| Peak Name | t <sub>R</sub> | Area    | Height | Width  | Area%         | Symmetry |
|-----------|----------------|---------|--------|--------|---------------|----------|
| 1         | <b>27.395</b>  | 46693.1 | 182.9  | 4.2557 | <b>51.755</b> | 0.947    |
| 2         | <b>38.058</b>  | 43525.9 | 114.7  | 6.3272 | <b>48.245</b> | 0.868    |

**Figure S36.** HPLC profile for **6b** (racemic).

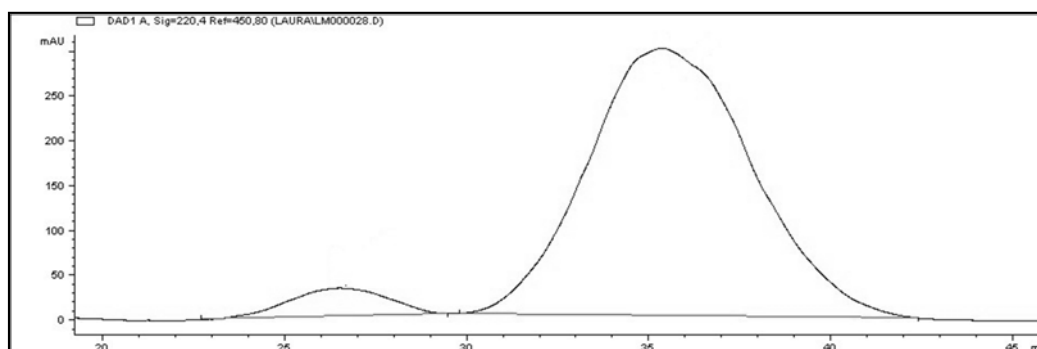

| Peak Name | t <sub>R</sub> | Area    | Height | Width  | Area%         | Symmetry |
|-----------|----------------|---------|--------|--------|---------------|----------|
| 1         | <b>26.48</b>   | 5962.5  | 31.4   | 3.1601 | <b>5.929</b>  | 1.072    |
| 2         | <b>35.358</b>  | 94596.8 | 298.8  | 5.2768 | <b>94.071</b> | 0.821    |

**Figure S37.** HPLC profile for **6b**. Table 2. 94:6 er.

**(S)-Di-tert-butyl-1-[5-bromo-1-(tert-butoxycarbonyl)-2-oxo-3-phenylindolin-3-yl]hydrazine-1,2-dicarboxylate (6c).**

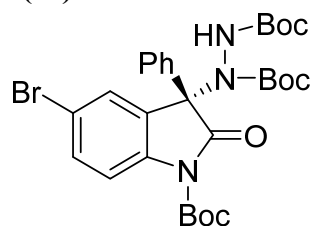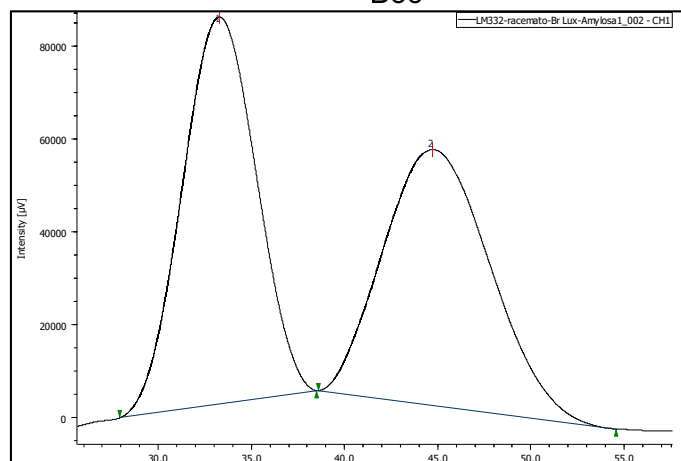

| Peak Name | t <sub>R</sub> | Area     | Height | Area%         | Height % | Symmetry |
|-----------|----------------|----------|--------|---------------|----------|----------|
| 1         | <b>33,275</b>  | 23004985 | 83155  | <b>51,164</b> | 60,217   | 1,004    |
| 2         | <b>44,708</b>  | 21957865 | 54937  | <b>48,836</b> | 39,783   | 1,153    |

**Figure S38.** HPLC profile for **6c** (racemic).

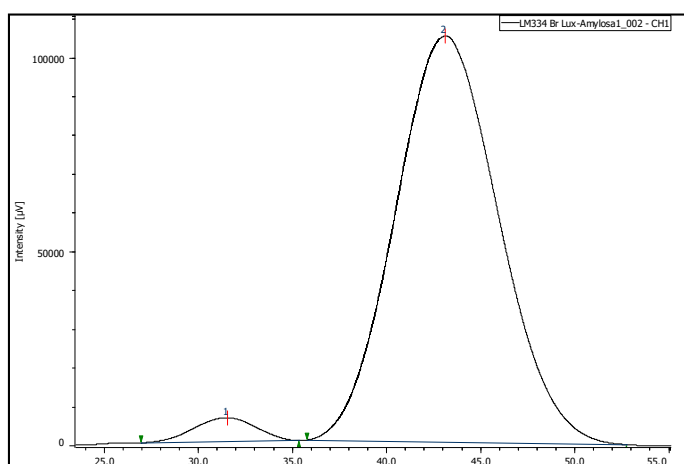

| Peak Name | t <sub>R</sub> | Area     | Height | Area%         | Height% | Symmetry |
|-----------|----------------|----------|--------|---------------|---------|----------|
| 1         | <b>31,542</b>  | 1413907  | 6169   | <b>3,426</b>  | 5,573   | 0,919    |
| 2         | <b>43,108</b>  | 39851860 | 104525 | <b>96,574</b> | 94,427  | 1,074    |

**Figure S39.** HPLC profile for **6c**. Table 2. 97:3 er.

**(S)-Di-*tert*-butyl-1-[1-(*tert*-butoxycarbonyl)-5-methoxy-2-oxo-3-phenylindolin-3-yl]hydrazine-1,2-dicarboxylate (6d).**

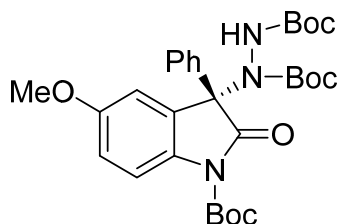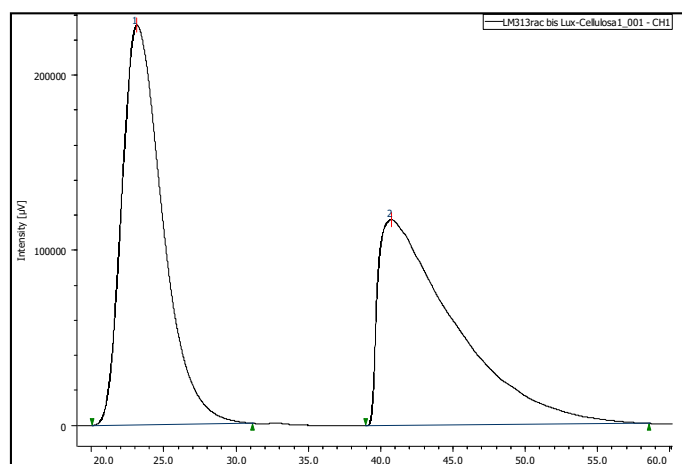

| Peak Name | $t_R$         | Area     | Height | Area%         | Height% | Symmetry |
|-----------|---------------|----------|--------|---------------|---------|----------|
| 1         | <b>23,142</b> | 44598008 | 227942 | <b>50,739</b> | 65,974  | 1,571    |
| 2         | <b>40,692</b> | 43298609 | 117559 | <b>49,261</b> | 34,026  | 5,053    |

**Figure S40.** HPLC profile for **6d** (racemic).

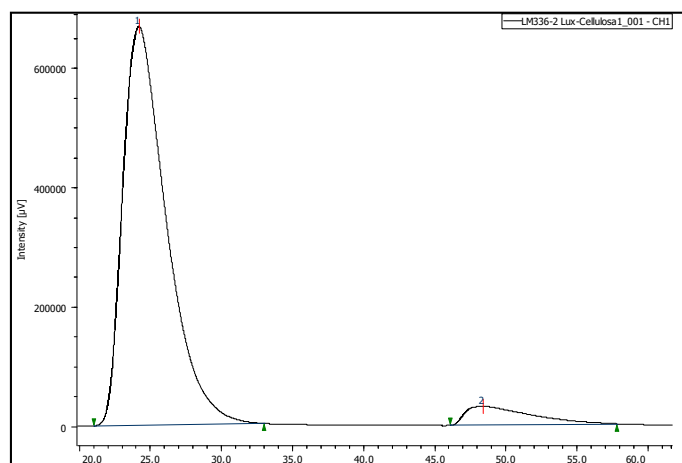

| Peak Name | $t_R$         | Area      | Height | Area%         | Height% | Symmetry |
|-----------|---------------|-----------|--------|---------------|---------|----------|
| 1         | <b>24,183</b> | 141635570 | 666399 | <b>93,432</b> | 95,487  | 1,672    |
| 2         | <b>48,400</b> | 9955985   | 31496  | <b>6,568</b>  | 4,513   | 2,527    |

**Figure S41.** HPLC profile for **6d**. Table 2. 93:7 er.



(*S*)-Di-*tert*-butyl-1-(1-(*tert*-butoxycarbonyl)-5-methyl-2-oxo-3-phenylindolin-3-yl)hydrazine-1,2-dicarboxylate (**6e**).

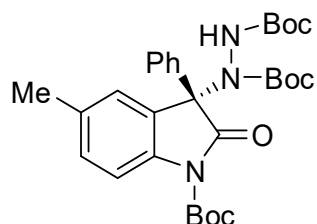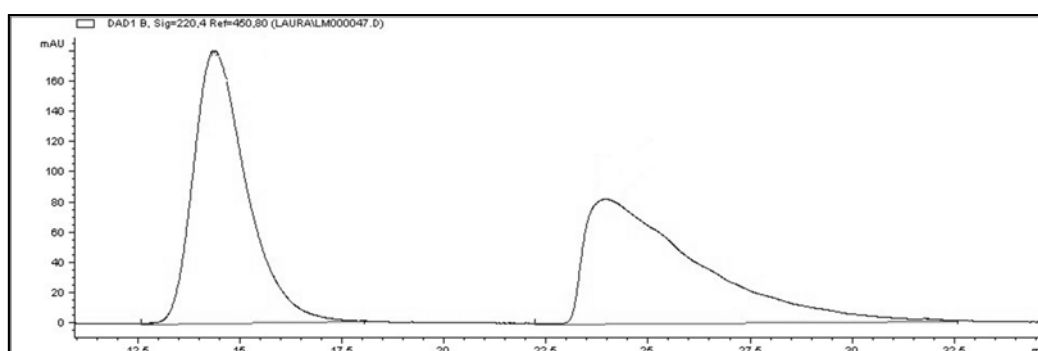

| Peak Name | t <sub>R</sub> | Area    | Height | Width  | Area%         | Symmetry |
|-----------|----------------|---------|--------|--------|---------------|----------|
| 1         | <b>14.359</b>  | 16457.3 | 180.9  | 1.5165 | <b>50.388</b> | 0.622    |
| 2         | <b>23.944</b>  | 16203.7 | 82.8   | 3.2613 | <b>49.612</b> | 0.224    |

Figure S42. HPLC profile for **6e** (racemic).

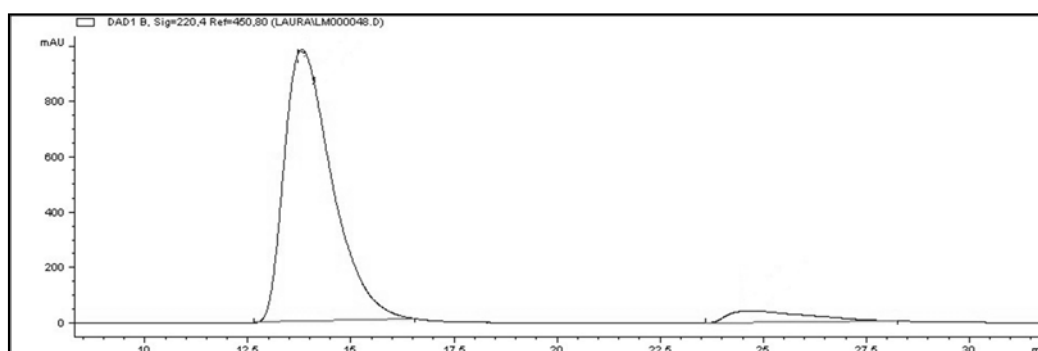

| Peak Name | t <sub>R</sub> | Area    | Height | Width  | Area%         | Symmetry |
|-----------|----------------|---------|--------|--------|---------------|----------|
| 1         | <b>13.786</b>  | 79530.5 | 985.2  | 1.3455 | <b>92.687</b> | 0.547    |
| 2         | <b>24.667</b>  | 6274.6  | 44.4   | 1.6633 | <b>7.313</b>  | 0.364    |

Figure S43. HPLC profile for **6e**. Table 2. 93:7 er.

**(S)-Di-*tert*-butyl-1-(1-(*tert*-butoxycarbonyl)-3-(4-methoxyphenyl)-2-oxoindolin-3-yl)hydrazine-1,2-dicarboxylate (6f).**

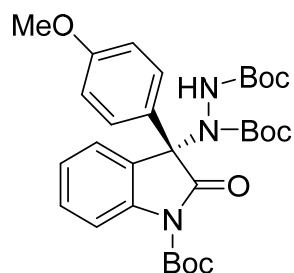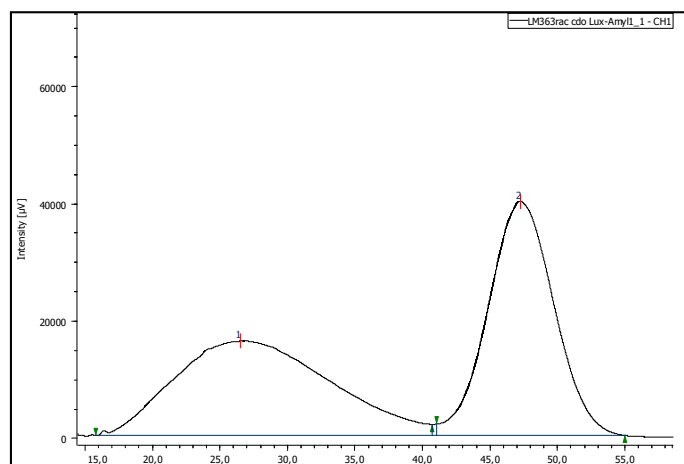

| Peak Name | t <sub>R</sub> | Area     | Height | Area%  | Height% | Symmetry |
|-----------|----------------|----------|--------|--------|---------|----------|
| 1         | 26,517         | 13004900 | 16099  | 49,077 | 28,752  | N/A      |
| 2         | 47,192         | 13493833 | 39895  | 50,923 | 71,248  | 0,973    |

**Figure S44.** HPLC profile for **6f** (racemic).

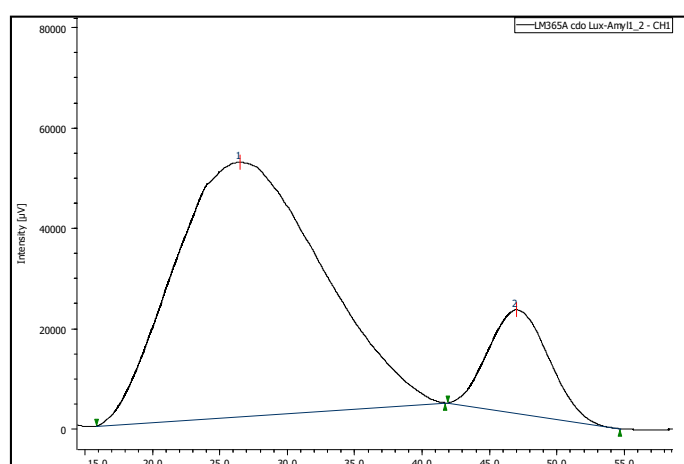

| Peak Name | t <sub>R</sub> | Area     | Height | Area%  | Height% | Symmetry |
|-----------|----------------|----------|--------|--------|---------|----------|
| 1         | 26,492         | 38412522 | 50620  | 85,714 | 71,110  | 1,211    |
| 2         | 46,925         | 6402293  | 20565  | 14,286 | 28,890  | 1,110    |

**Figure S45.** HPLC profile for **6f**. Table 2. 86:14 er.

**(S)-Di-tert-butyl-1-(1-(tert-butoxycarbonyl)-2-oxo-3-(4-(trifluoromethyl)phenyl)indolin-3-yl)hydrazine-1,2-dicarboxylate (6g).**

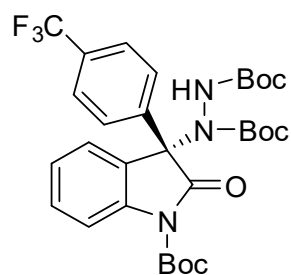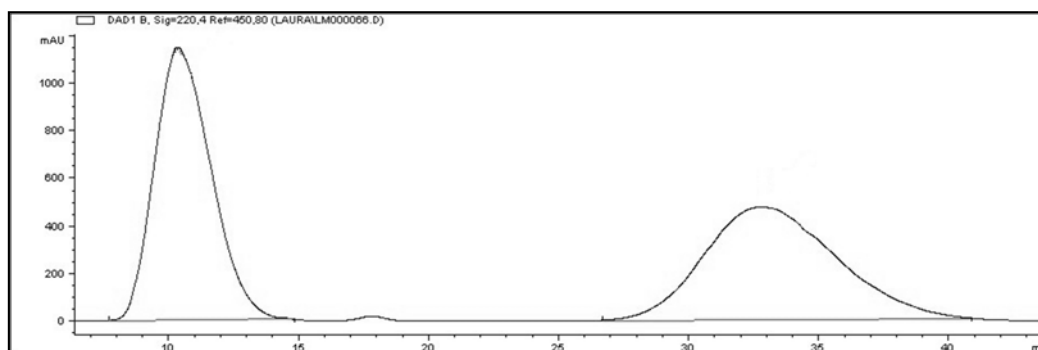

| Peak Name | t <sub>R</sub> | Area     | Height | Width  | Area%         | Symmetry |
|-----------|----------------|----------|--------|--------|---------------|----------|
| 1         | <b>10.36</b>   | 174134.8 | 1150.4 | 2.5229 | <b>50.345</b> | 0.725    |
| 2         | <b>32.843</b>  | 171750.6 | 477.8  | 5.9907 | <b>49.655</b> | 0.8      |

**Figure S46.** HPLC profile for **6g** (racemic).

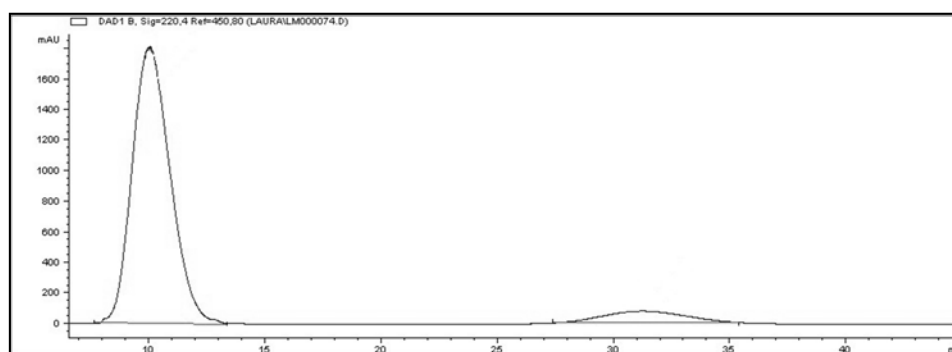

| Peak Name | t <sub>R</sub> | Area     | Height | Width  | Area%         | Symmetry |
|-----------|----------------|----------|--------|--------|---------------|----------|
| 1         | <b>9.997</b>   | 206703.9 | 1809.1 | 1.9043 | <b>91.134</b> | 0.722    |
| 2         | <b>31.254</b>  | 20108.8  | 79.6   | 4.212  | <b>8.866</b>  | 0.915    |

**Figure S47.** HPLC profile for **6g**. Table 2. 91:9 er.

**(S)-3-Amino-3-phenylindolin-2-one (8).**

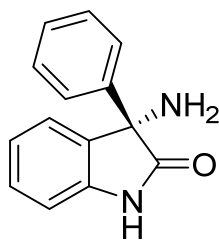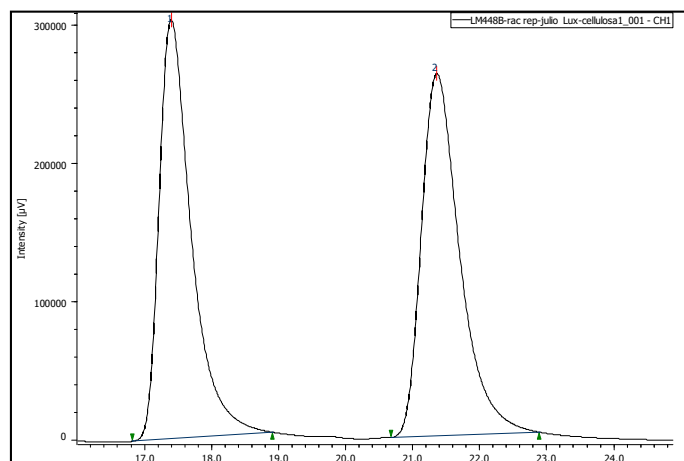

| Peak Name | t <sub>R</sub> | Area     | Height | Area%         | Height% | Symmetry |
|-----------|----------------|----------|--------|---------------|---------|----------|
| 1         | <b>17,400</b>  | 10109409 | 302477 | <b>49,331</b> | 53,617  | 1,680    |
| 2         | <b>21,350</b>  | 10383581 | 261671 | <b>50,669</b> | 46,383  | 1,514    |

**Figure S48.** HPLC profile for **8** (racemic).

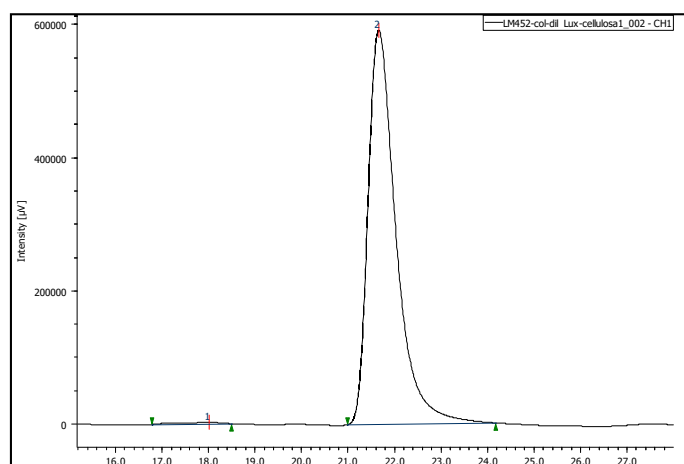

| Peak Name | t <sub>R</sub> | Area     | Height | Area%         | Height% | Symmetry |
|-----------|----------------|----------|--------|---------------|---------|----------|
| 1         | <b>18,017</b>  | 173409   | 2423   | <b>0,700</b>  | 0,408   | 0,684    |
| 2         | <b>21,650</b>  | 24615475 | 591128 | <b>99,300</b> | 99,592  | 1,620    |

**Figure S49.** HPLC profile for **8**. 99:1 er.

**(S)-N-(2-Oxo-3-phenylindolin-3-yl)acetamide (9).**

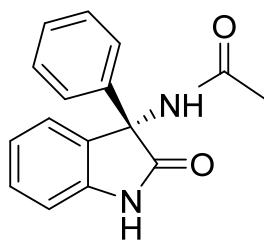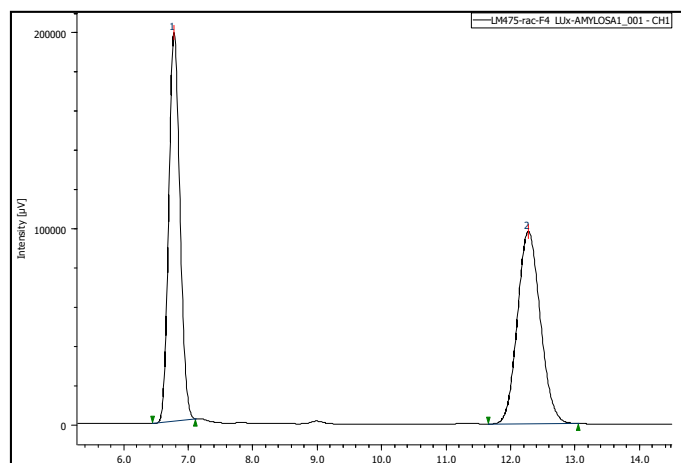

| Peak Name | t <sub>R</sub> | Area    | Height | Area%         | Height% | Symmetry |
|-----------|----------------|---------|--------|---------------|---------|----------|
| 1         | <b>6,783</b>   | 2370162 | 197352 | <b>49,610</b> | 66,883  | 1,083    |
| 2         | <b>12,267</b>  | 2407380 | 97719  | <b>50,390</b> | 33,117  | 1,100    |

**Figure S50.** HPLC profile for **9** (racemic).

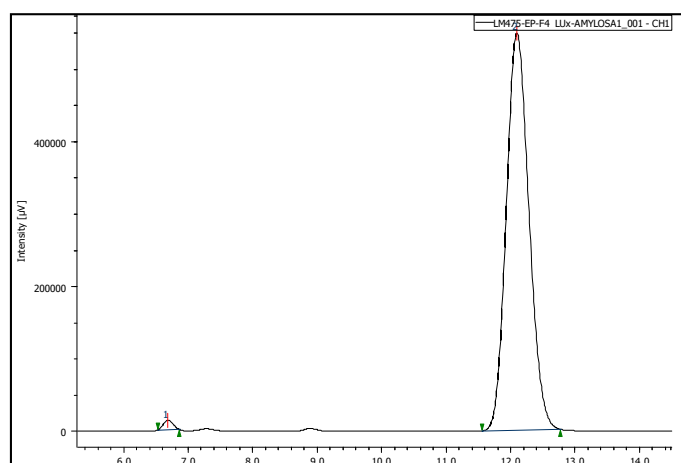

| Peak Name | t <sub>R</sub> | Area     | Height | Area%         | Height% | Symmetry |
|-----------|----------------|----------|--------|---------------|---------|----------|
| 1         | <b>6,683</b>   | 137192   | 13085  | <b>1,018</b>  | 2,335   | 1,059    |
| 2         | <b>12,092</b>  | 13341103 | 547398 | <b>98,982</b> | 97,665  | 1,122    |

**Figure S51.** HPLC profile for **9**. 99:1 er.

**(S)-1-(2-Oxo-3-phenylindolin-3-yl)-3-phenylurea (10).**

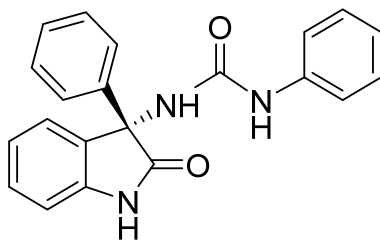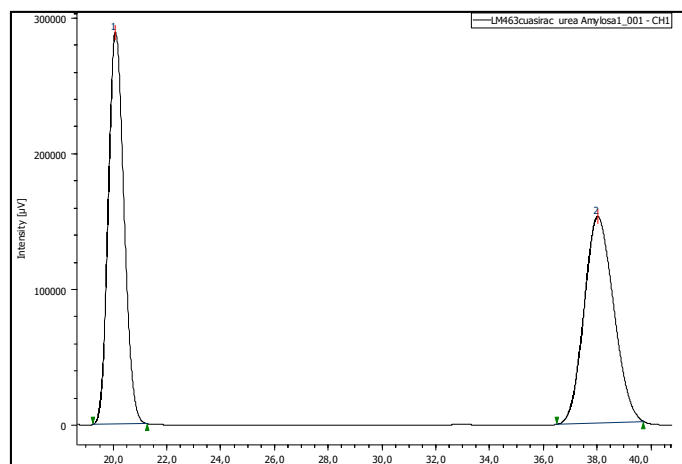

| Peak Name | t <sub>R</sub> | Area     | Height | Area%         | Height% | Symmetry |
|-----------|----------------|----------|--------|---------------|---------|----------|
| 1         | <b>20,092</b>  | 11682793 | 288021 | <b>50,273</b> | 65,501  | 1,142    |
| 2         | <b>37,992</b>  | 11556092 | 151701 | <b>49,727</b> | 34,499  | 1,120    |

**Figure S52.** HPLC profile for **10** (racemic).

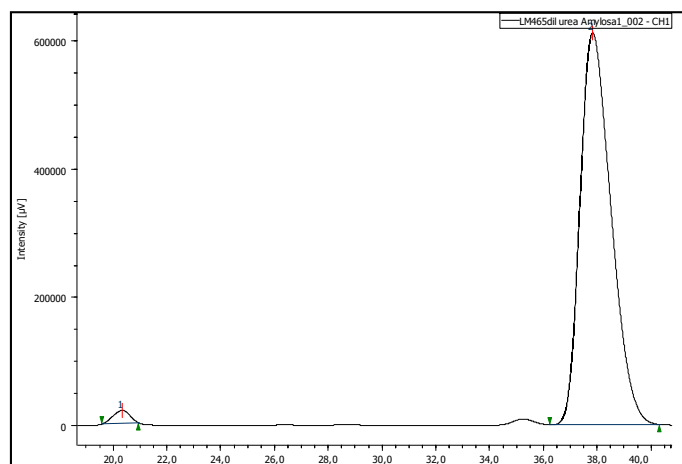

| Peak Name | t <sub>R</sub> | Area     | Height | Area%         | Height% | Symmetry |
|-----------|----------------|----------|--------|---------------|---------|----------|
| 1         | <b>20,342</b>  | 867306   | 20198  | <b>1,749</b>  | 3,204   | 0,905    |
| 2         | <b>37,800</b>  | 48720274 | 610210 | <b>98,251</b> | 96,796  | 1,347    |

**Figure S53.** HPLC profile for **10**. 98:2 er.

**(S)-1-(2-Oxo-3-phenylindolin-3-yl)-3-phenylthiourea (11).**

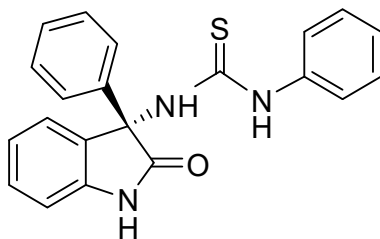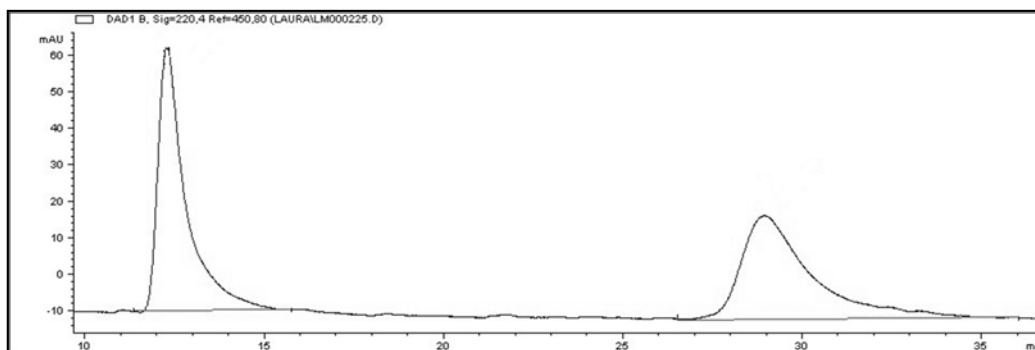

| Peak Name | t <sub>R</sub> | Area   | Height | Width  | Area%         | Symmetry |
|-----------|----------------|--------|--------|--------|---------------|----------|
| 1         | <b>12.273</b>  | 3922.5 | 72.4   | 0.9027 | <b>49.933</b> | 0.447    |
| 2         | <b>28.949</b>  | 3933   | 28.6   | 2.2942 | <b>50.067</b> | 0.498    |

**Figure S54.** HPLC profile for **11** (racemic).

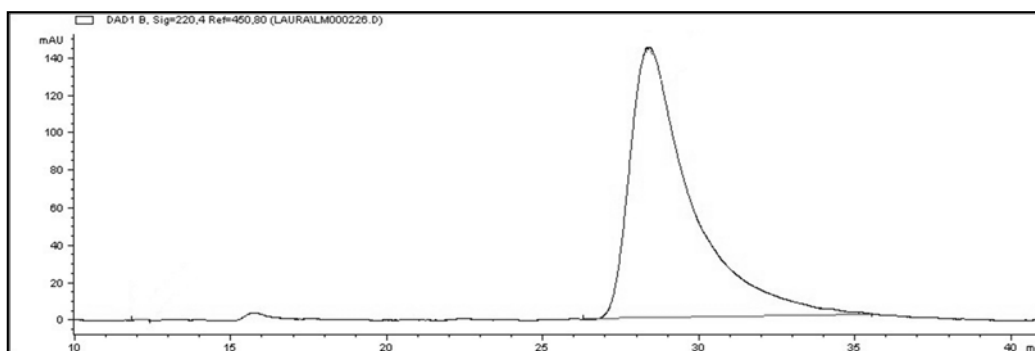

| Peak Name | t <sub>R</sub> | Area    | Height | Width  | Area%         | Symmetry |
|-----------|----------------|---------|--------|--------|---------------|----------|
| 1         | <b>12.100</b>  | 9.2     | 4.7E-1 | 0.3262 | <b>0.046</b>  | 0.956    |
| 2         | <b>28.378</b>  | 19863.2 | 144.8  | 2.2858 | <b>99.954</b> | 0.431    |

**Figure S55.** HPLC profile for **11**. 99:1 er.

**(S)-3-Phenyl-3-(piperidin-1-yl)indolin-2-one (12).**

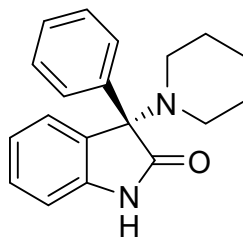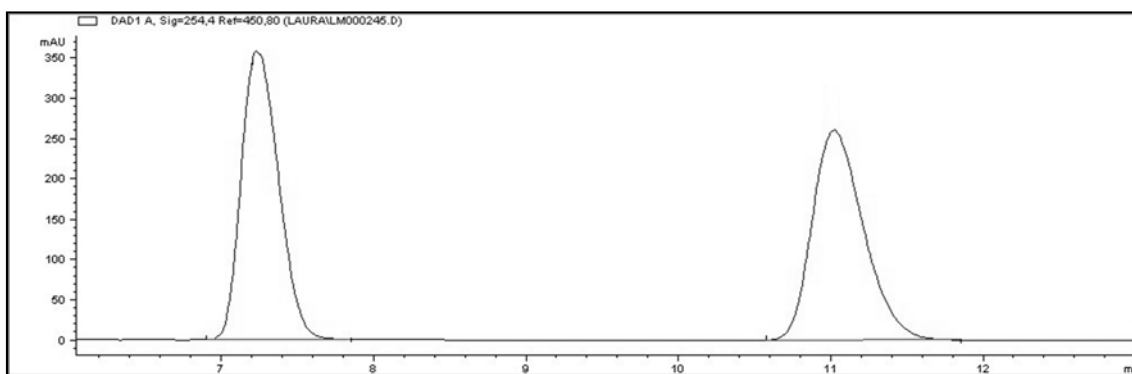

| Peak Name | t <sub>R</sub> | Area   | Height | Width  | Area%         | Symmetry |
|-----------|----------------|--------|--------|--------|---------------|----------|
| 1         | <b>7.232</b>   | 6095.7 | 360    | 0.2711 | <b>49.930</b> | 0.723    |
| 2         | <b>11.019</b>  | 6112.8 | 260.4  | 0.3666 | <b>50.070</b> | 0.71     |

**Figure S56.** HPLC profile for **12** (racemic).

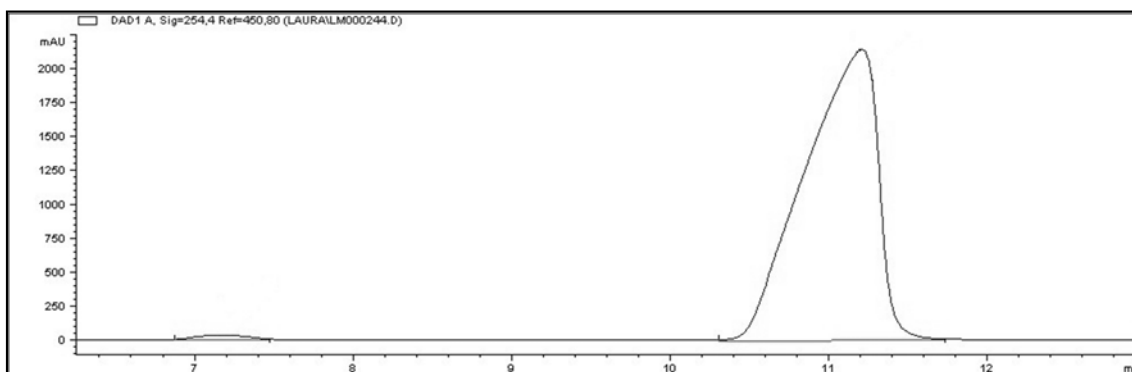

| Peak Name | t <sub>R</sub> | Area    | Height | Width  | Area%         | Symmetry |
|-----------|----------------|---------|--------|--------|---------------|----------|
| 1         | <b>7.163</b>   | 834.5   | 34.8   | 0.3996 | <b>1.195</b>  | 0.879    |
| 2         | <b>11.204</b>  | 69020.5 | 2151.1 | 0.5348 | <b>98.805</b> | 3.001    |

**Figure S57.** HPLC profile for **12**. 99:1 er.
